# Supplementary material for: Unimolecular photolysis mechanisms of formamide: the effect of thermal energy
Source: Royal Society of Chemistry journal article supplement (doi:10.1039/d0cp03718d), 2020-01-01
Supplement: d0cp03718d1.pdf [file d0cp03718d1.pdf]

***Electronic Supplementary Information (ESI)***

***Unimolecular photolysis mechanisms of formamide:***

***The effect of thermal energy***

by

Parichart Suwannakham

and

Kritsana Sagarik\*

*School of Chemistry*

*Institute of Science*

*Suranaree University of Technology*

*Nakhon Ratchasima 30000*

*Thailand*

## ***Kinetic and Thermodynamic Properties Calculations:***

In this study, the equations used in the kinetic and thermodynamic analysis are as follows:

### ***The classical rate constant:***

$$k^{\text{Class}}(T) = \frac{k_B T}{h} \frac{Q^\ddagger}{Q^R} e^{-\Delta E^\ddagger/k_B T}. \quad (1)$$

$Q^\ddagger$  and  $Q^R$  are the partition functions of the transition and reactant structures, respectively, and  $\Delta E^\ddagger$  is the potential energy barrier obtained from the relaxed-scan energy curve.  $k_B$  and  $h$  are the Boltzmann and Planck constants, respectively.

### ***The rate constant with quantized vibrations:***

$$k^{\text{Q-vib}}(T) = \frac{k_B T}{h} \frac{Q_{\text{ZPE}}^\ddagger}{Q_{\text{ZPE}}^R} e^{-\Delta E_{\text{ZPE}}^\ddagger/k_B T}. \quad (2)$$

$Q_{\text{ZPE}}^\ddagger$  and  $Q_{\text{ZPE}}^R$  are the partition functions of the transition and reactant structures, respectively, obtained with respect to their zero-point vibrational energies, and based on the harmonic oscillator approximation.  $\Delta E_{\text{ZPE}}^\ddagger$  is the barrier height obtained with the zero-point vibrational energy. <sup>a)</sup>

### ***The crossover temperature:***

The temperature below which the transition states are dominated by quantum mechanical tunneling;

$$T_c = \frac{h\Omega^\ddagger}{2\pi k_B}. \quad (3)$$

$\Omega^\ddagger$  is the imaginary frequency of the transition structure.  $T_c$  is the temperature below which the transition states are dominated by quantum mechanical tunneling.

### ***The rate constants with quantized vibrations and second-order Wigner correction:***

$$k^{\text{S-Wig}}(T) = \kappa^{\text{S-Wig}}(T) k^{\text{Q-vib}}(T). \quad (4)$$

$\kappa^{\text{S-Wig}}$  is the Wigner transmission coefficient,

$$\kappa^{\text{S-Wig}}(T) = 1 + \frac{1}{24} \left( \frac{h\Omega^\ddagger}{k_B T} \right)^2, \quad (5)$$

which is 1 in the classical limit ( $h = 0$ ). <sup>b), c)</sup>

***The activation enthalpy:***

For the reactions with energy barrier higher than  $k_B T$ , the linear relationship between  $\ln k^{\text{Q-vib}}(T)$  and  $1/T$  was used to calculate the activation enthalpy ( $\Delta H^{\circ,\ddagger}$ ) through the Eyring equation,<sup>a)</sup>

$$\ln k^{\text{Q-vib}}(T) = \ln A - \frac{\Delta H^{\circ,\ddagger}}{RT} + \frac{\Delta S^{\circ,\ddagger}}{R}, \quad (6)$$

$\Delta S^{\circ,\ddagger}$  is the activation entropy, and  $R$  is the gas constant.

- a) J. E. House, *Principles of Chemical Kinetics 2<sup>nd</sup> edn*, Elsevier, USA, 2007.
- b) E. Wigner, *Z. Phys. Chem.*, 1932, **15**, 203–216.
- c) E. Wigner, *Trans. Faraday Soc.*, 1938, **34**, 29–41.

**Figure S1<sup>†</sup>** Equilibrium (<sup>eq</sup>) and transition (<sup>opt,†</sup>) structures in the ground ( $S_0$ ) and lowest excited ( $S_1$  and  $T_1$ ) states obtained from the CASPT2(6,9)/aug-cc-pVDZ geometry optimizations.  
→ = vibrational normal mode of the imaginary frequency.

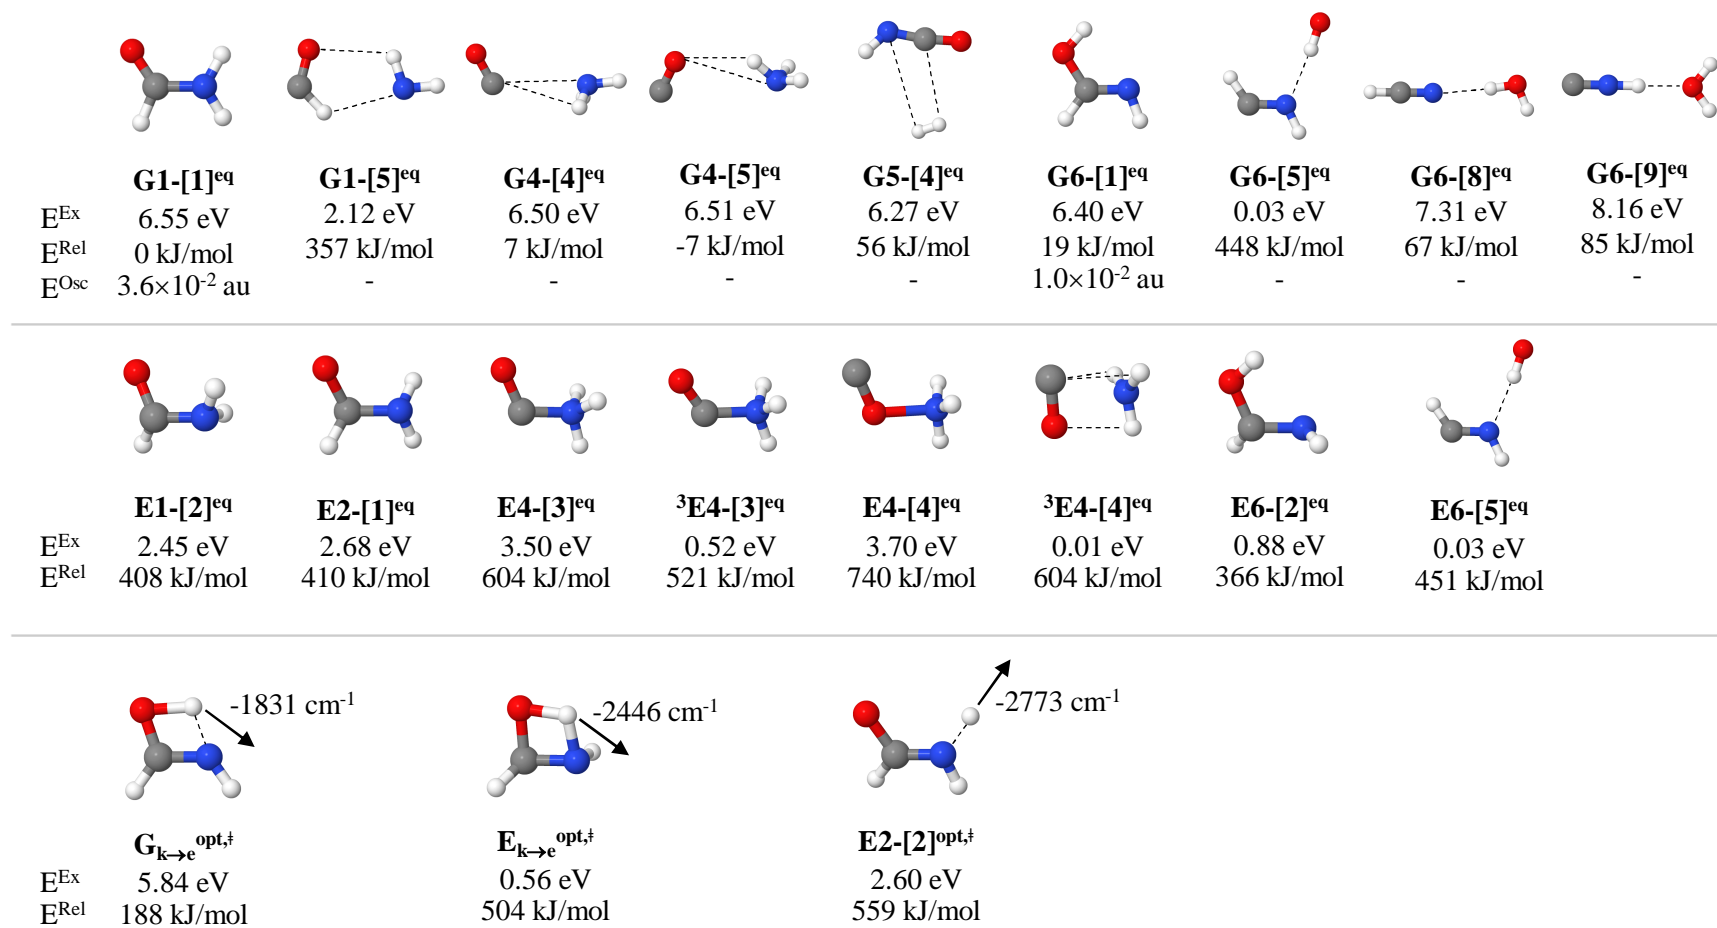

**Figure S1<sup>†</sup>**

**Figure S2<sup>†</sup>**

- a) Potential energy curves for C–N, N–H and C–H dissociations, obtained based on the CASPT2(6,9) methods with the aug-cc-pVDZ, aug-cc-pVTZ and aug-cc-pVQZ basis sets.
- b) Plots of the activation Gibbs free energies of the rate determining process in Channel (1) as a function of temperature (T).
- c) relax-scan potential energy curves for N–H and C–H dissociations in the  $T_1$  states obtained by CASPT2(6,9)/aug-cc-pVDZ calculations.
- d) intramolecular isomerization of the H(6) atom from the C to N atom in Channel (4) computed in the  $S_1$  and  $T_1$  states.

Energies are in kJ/mol unless otherwise specified. Solid lines represent the relax-scan potential energies. The dash lines denote the energies calculated using the geometries on relax-scan potential energy curves.

a)

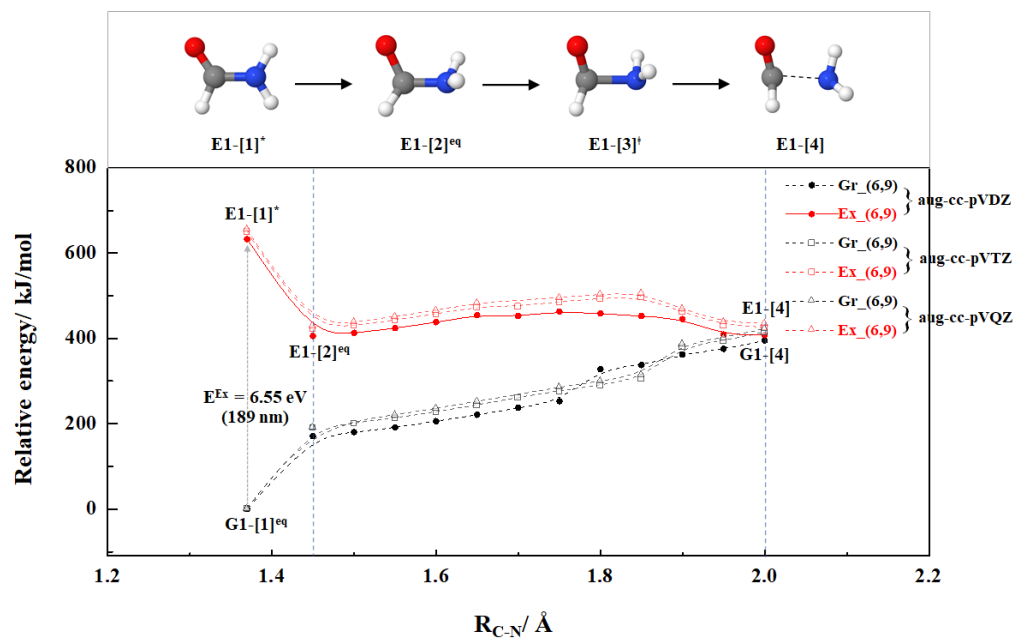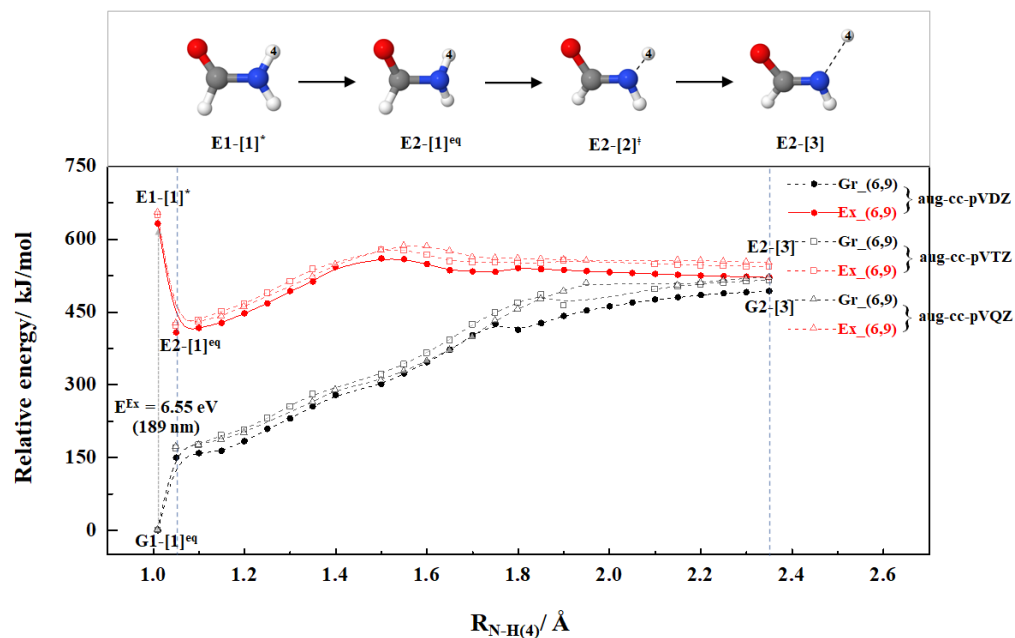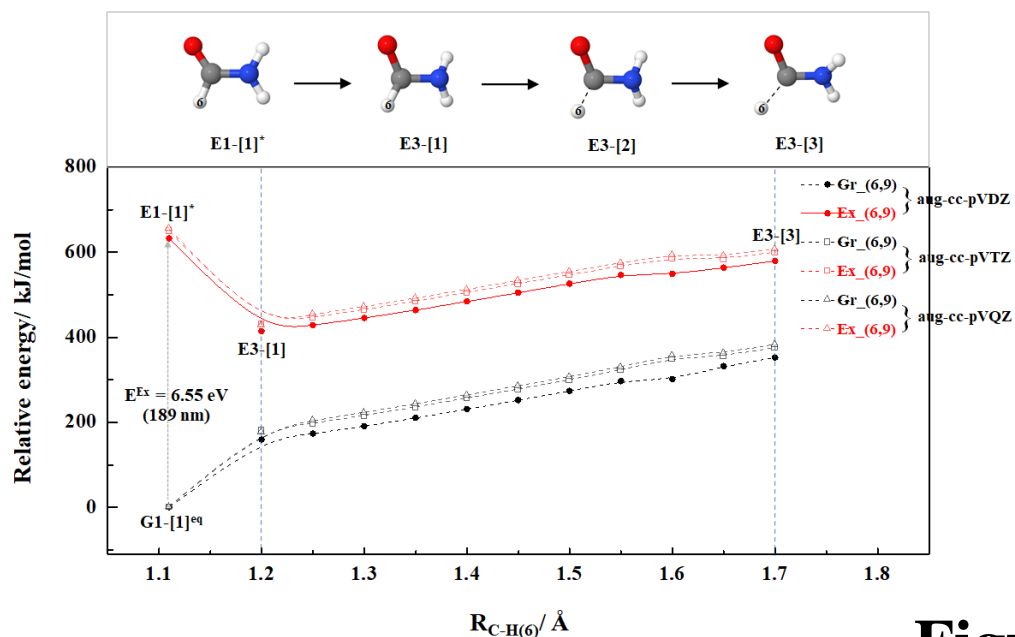

Figure S2a<sup>†</sup>

b)

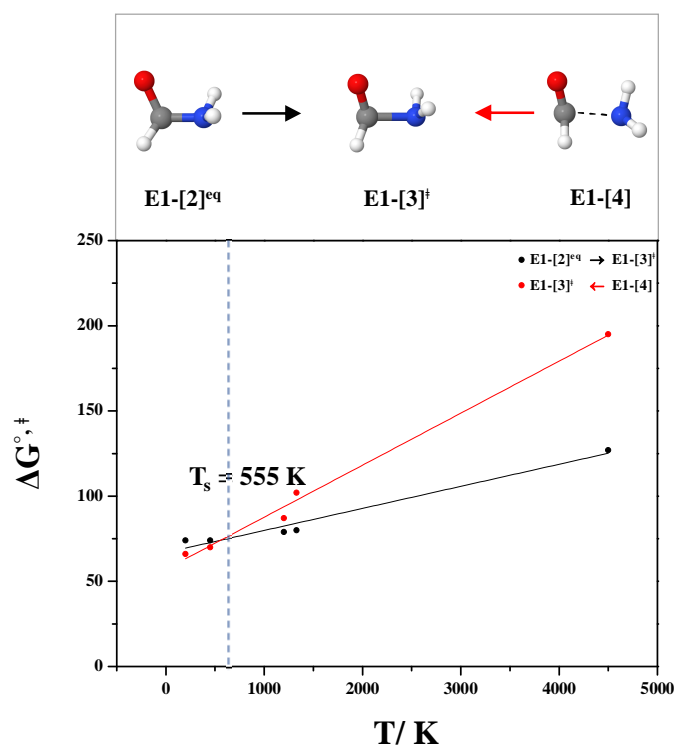



c)

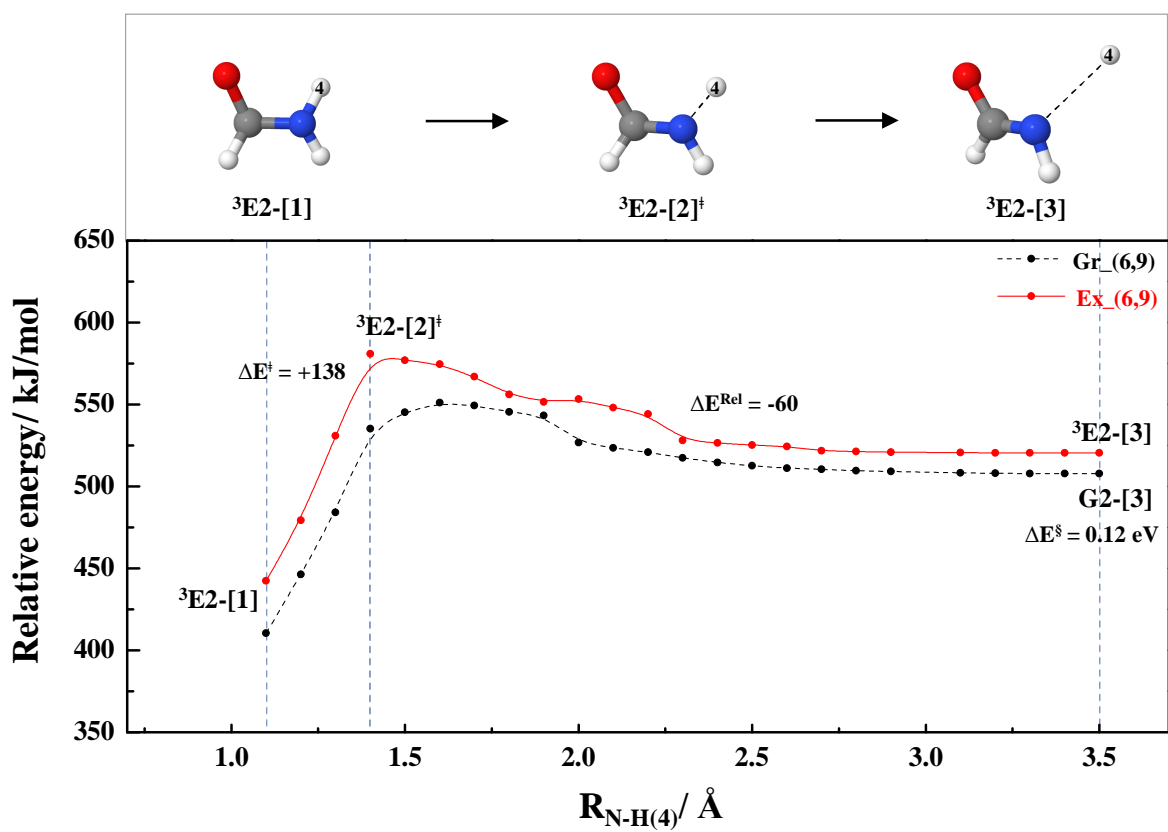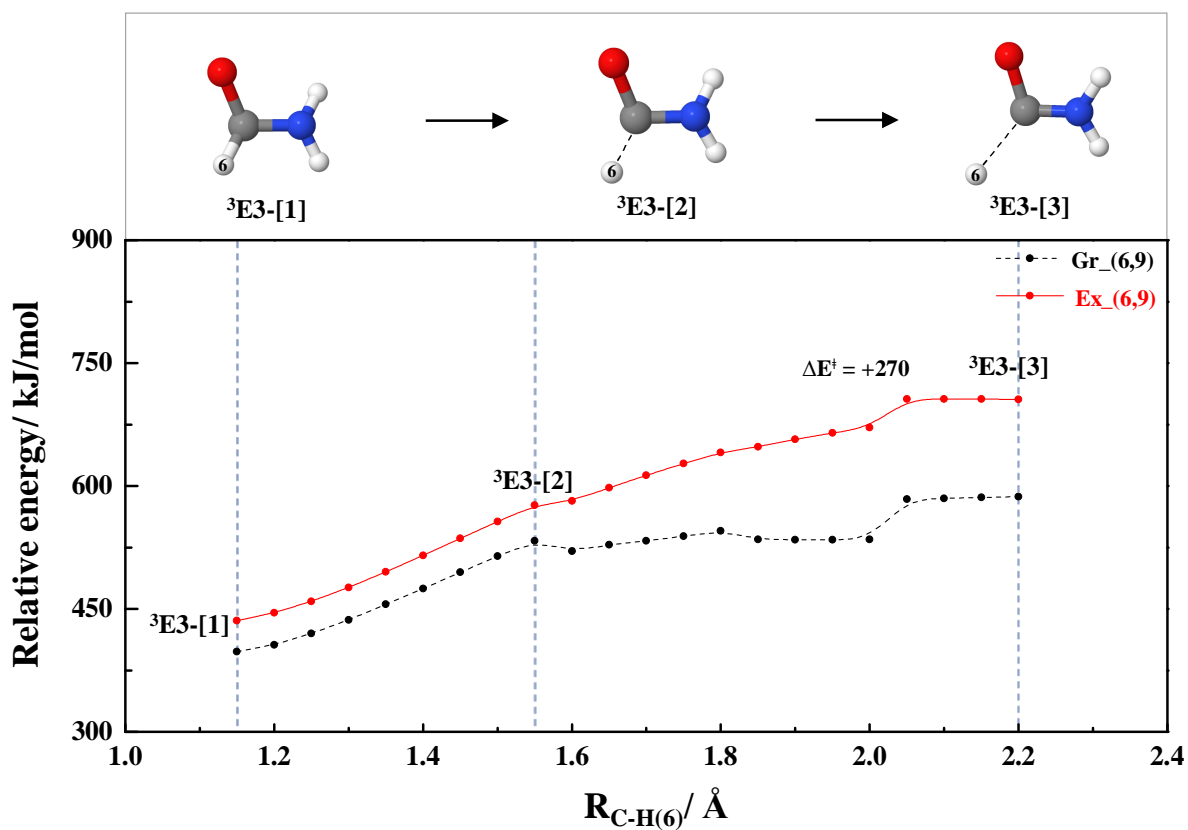Figure S2c<sup>†</sup>

d)

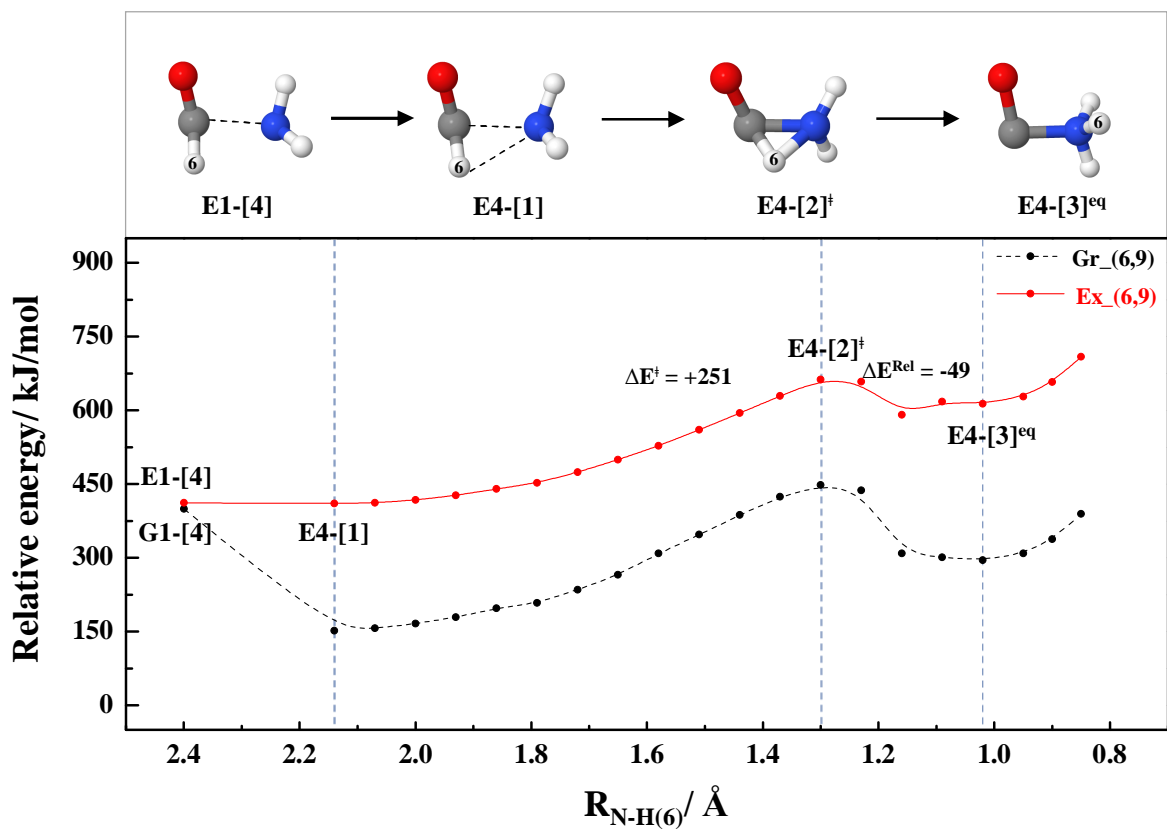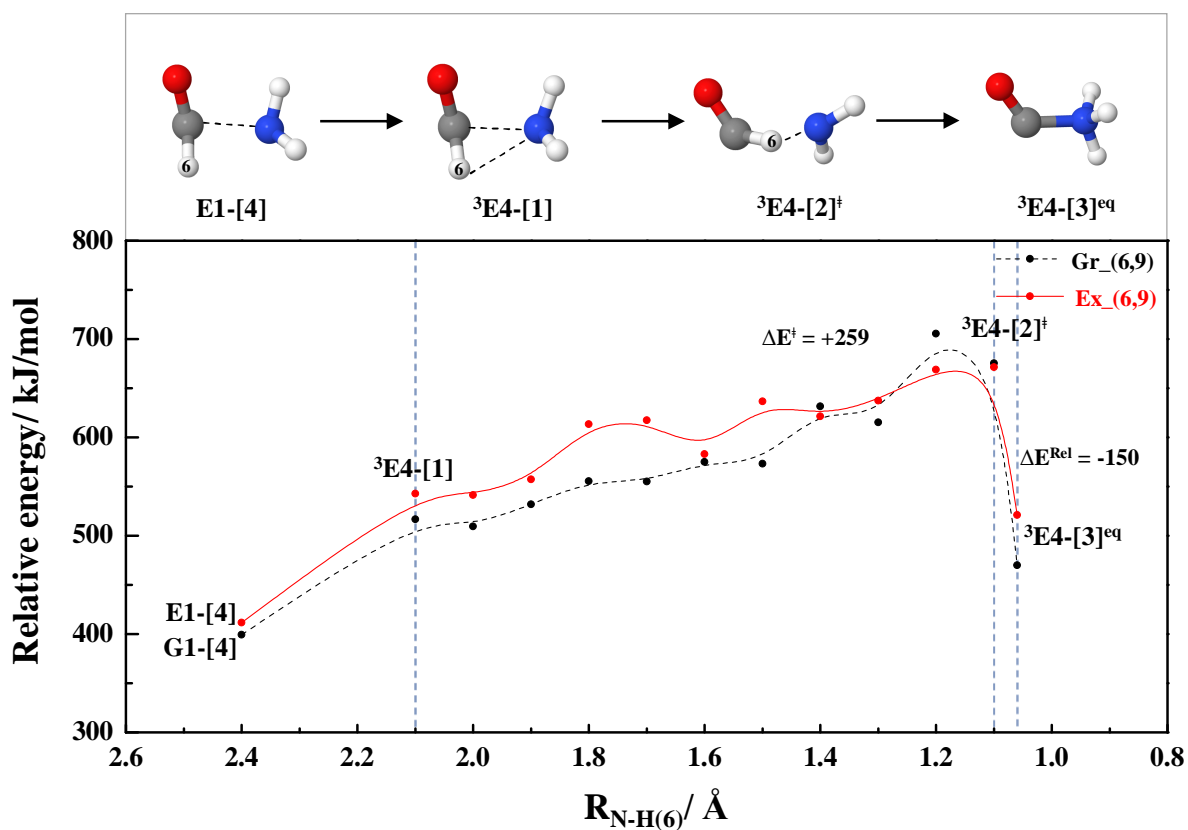

Figure S2d<sup>†</sup>

- Figure S3<sup>†</sup>** Relax-scan potential energy curves obtained by CASPT2(6,9)/aug-cc-pVDZ calculations.
- a) formation of CO–NH–H<sub>2</sub> van der Waals cluster (**E5-[3]**) at the intersection of the S<sub>0</sub> and S<sub>1</sub> states using **E1-[4]** as the precursor.
  - b) formation of the C–N bond in **G5-[3]** to yield the HNC and H<sub>2</sub> products in the S<sub>0</sub> state (**G5-[6]<sup>eq</sup>**).
  - c) formation of the HNC–H<sub>2</sub>O complex in the S<sub>0</sub> state using **G6-[5]<sup>eq</sup>** as the precursor (Channel (6)).

The energies are in kJ/mol unless otherwise specified. The solid lines represent the relax-scan potential energies. The dashed lines denote the energies calculated using the geometries of the relax-scan potential energy curves.

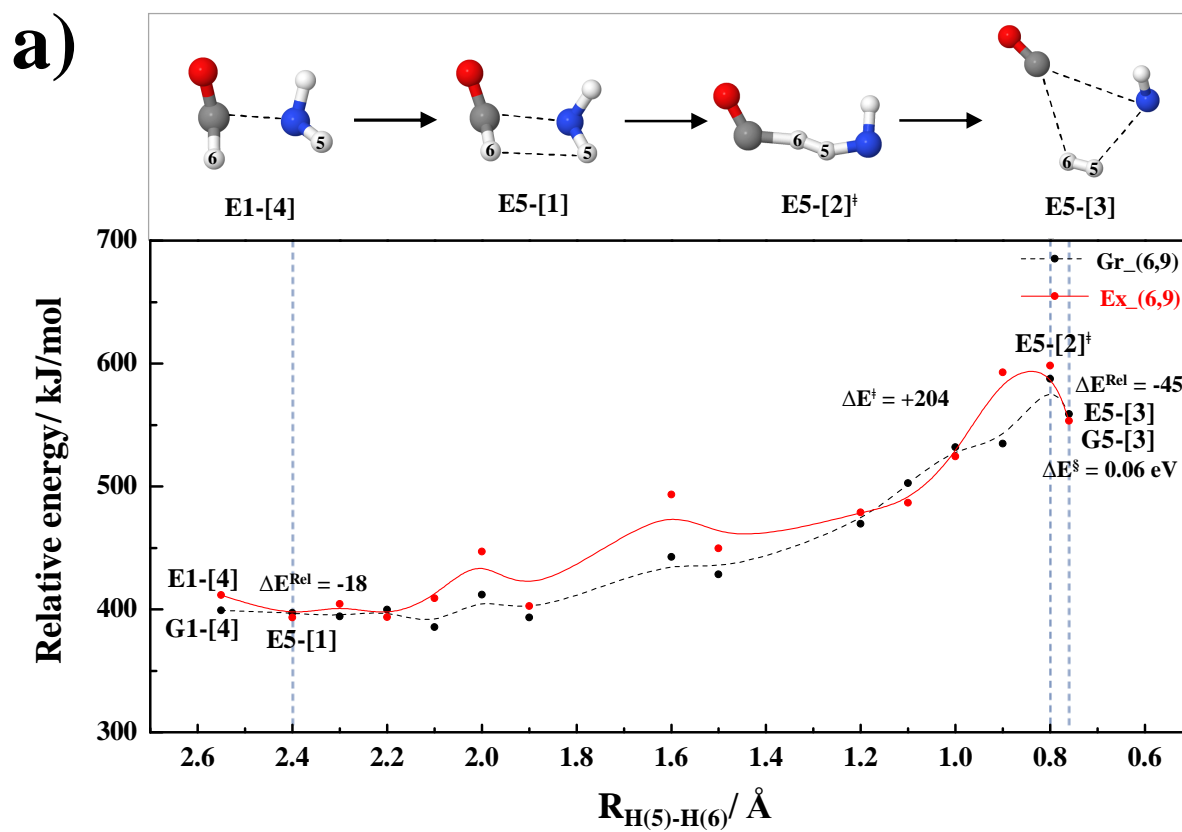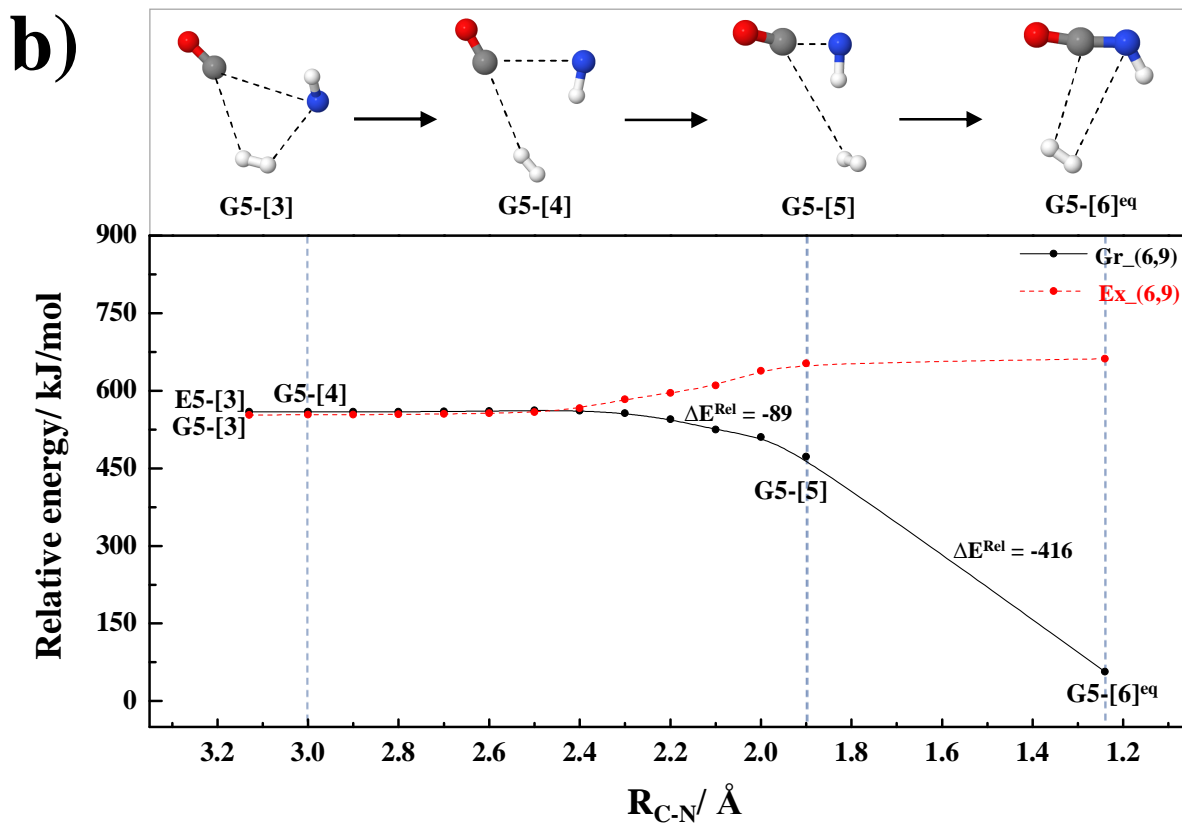

**Figure S3<sup>†</sup>**

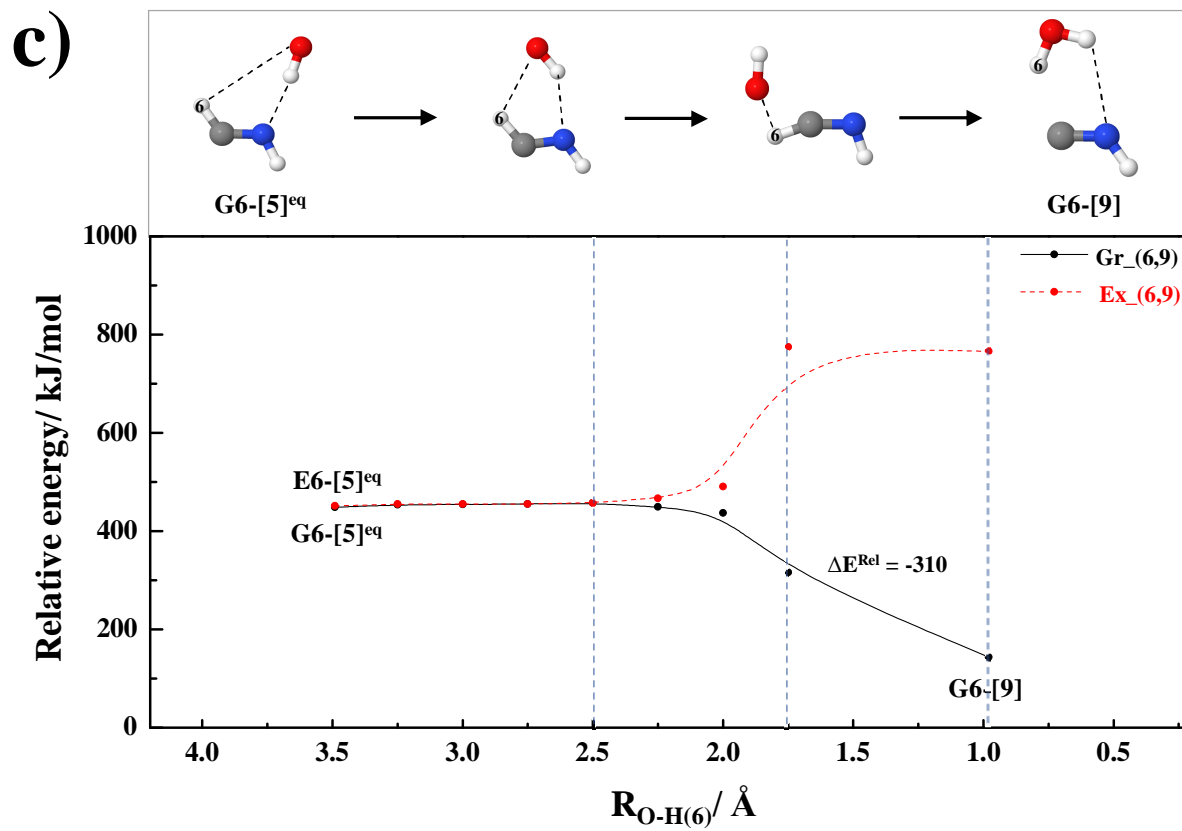

**Figure S3<sup>†</sup>**

**Figure S4<sup>†</sup>** a)–b) Plots of the rate constants ( $k^{\text{F-Wig}}$  and  $k^{\text{TST/W}}$ ) as functions of  $1000/T$  for the keto-enol tautomerization of  $\text{HCONH}_2$  in the forward and reverse directions, respectively.  
c) Plots of the equilibrium constants ( $K$ ) as functions of  $1000/T$ .

<sup>†</sup>R. M. Vichiatti, A. B. F. da Silva and R. L. A. Haiduke, *Mol. Astrophys.*, 2018, **10**, 1-10.

a)

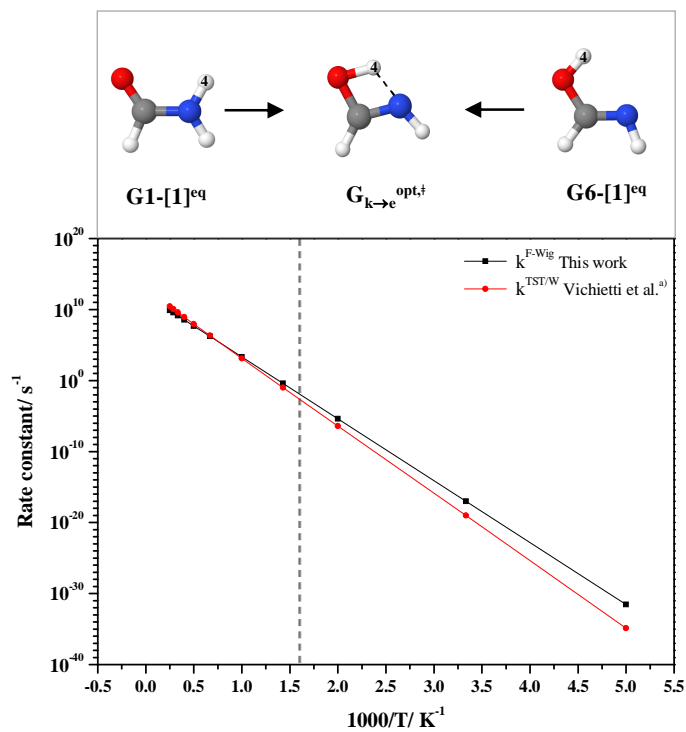

b)

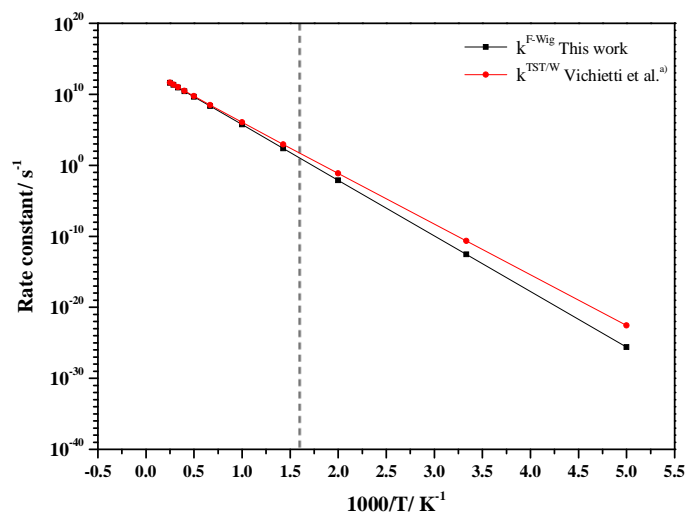

c)

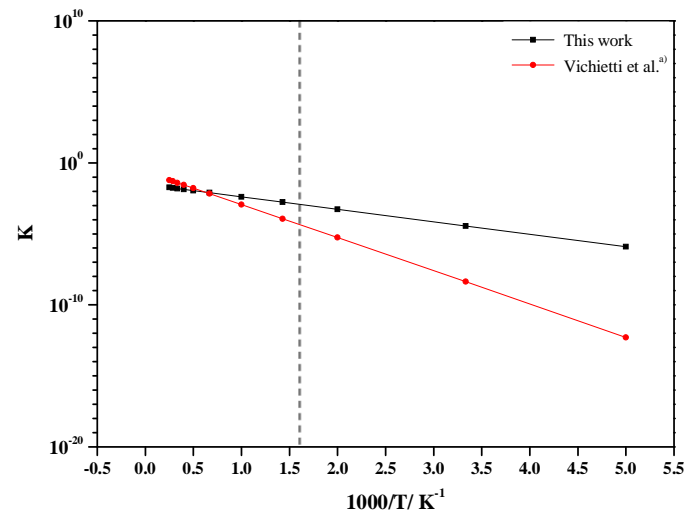

Figure S4<sup>†</sup>

**Table S1a**<sup>†</sup> Equilibrium geometries of HCONH<sub>2</sub> and HCOHNH in the S<sub>0</sub> and S<sub>1</sub> states obtained from CASPT2(6,9)/aug-cc-pVDZ geometry optimizations compared with available theoretical<sup>a), c)</sup> and experimental data.<sup>b)</sup> Distances and angles are in Å and degree, respectively.

| S <sub>0</sub>       | 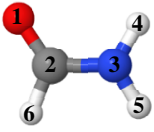 |                      |                    |  |                           |
|----------------------|-----------------------------------------------------------------------------------|----------------------|--------------------|-------------------------------------------------------------------------------------|---------------------------|
|                      | G1-[1] <sup>eq</sup>                                                              | CASPT2 <sup>a)</sup> | Exp. <sup>b)</sup> | G6-[1] <sup>eq</sup>                                                                | MP2/6-31G <sup>**c)</sup> |
| R <sub>C-N</sub>     | 1.370                                                                             | 1.357                | 1.352              | 1.280                                                                               | 1.273                     |
| R <sub>C-O</sub>     | 1.223                                                                             | 1.214                | 1.219              | 1.360                                                                               | 1.349                     |
| R <sub>N-H(4)</sub>  | 1.013                                                                             | 1.004                | 1.002              | 2.303                                                                               | -                         |
| R <sub>N-H(5)</sub>  | 1.010                                                                             | 1.001                | 1.002              | 1.023                                                                               | 1.016                     |
| R <sub>C-H(6)</sub>  | 1.107                                                                             | 1.098                | 1.098              | 1.096                                                                               | 1.087                     |
| R <sub>O-H(4)</sub>  | -                                                                                 | -                    | -                  | 0.973                                                                               | 0.971                     |
| ∠ <sub>H(4)NC</sub>  | 117.7                                                                             | 119.3                | 118.5              | 54.5                                                                                | -                         |
| ∠ <sub>H(5)NC</sub>  | 119.4                                                                             | 121.1                | 120.0              | 109.6                                                                               | 110.0                     |
| ∠ <sub>NCO</sub>     | 124.6                                                                             | 124.7                | 124.7              | 121.7                                                                               | 121.6                     |
| ∠ <sub>NCH(6)</sub>  | 112.8                                                                             | 112.5                | 112.7              | 127.6                                                                               | 128.1                     |
| ∠ <sub>H(4)NCO</sub> | -11.7                                                                             | -4.1                 | 0.0                | 0.0                                                                                 | -                         |

<sup>a)</sup> N. V. Tukachev, V. A. Bataev, A. V. Abramkov, I. A. Godunov, *Comput Theor Chem.* **2016**, 1080, 23-32.

<sup>b)</sup> E. Hirota, R. Sugisaki, C. J. Nielsen, G. O. Sørensen, *J. Mol. Spectrosc.* **1974**, 49, 251-267.

<sup>c)</sup> J. Tortajada, E. Leon, J. P. Morizur, A. Luna, O. Mo, M. Yanez, *J. Phys Chem.* **1995**, 99, 13890-13898.

<sup>d)</sup> N. V. Tukachev, V. A. Bataev, A. V. Abramkov, I. A. Godunov, *Comput Theor Chem.* **2016**, 1080, 23-32.



Table S1a<sup>†</sup> (Cont.)

| S <sub>1</sub>         | 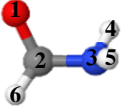 |                      |  |                      |  |                      |
|------------------------|-----------------------------------------------------------------------------------|----------------------|-------------------------------------------------------------------------------------|----------------------|-------------------------------------------------------------------------------------|----------------------|
|                        | E1-[2] <sup>eq</sup>                                                              | CASPT2 <sup>d)</sup> | E2-[1] <sup>eq</sup>                                                                | CASPT2 <sup>d)</sup> | E6-[2] <sup>eq</sup>                                                                | CASPT2 <sup>d)</sup> |
| R <sub>C-N</sub>       | 1.415                                                                             | 1.412                | 1.423                                                                               | 1.411                | 1.280                                                                               | 1.442                |
| R <sub>C-O</sub>       | 1.385                                                                             | 1.360                | 1.374                                                                               | 1.372                | 1.360                                                                               | 1.394                |
| R <sub>N-H(4)</sub>    | 1.023                                                                             | 1.012                | 1.020                                                                               | 1.01                 | 2.303                                                                               | 2.295                |
| R <sub>N-H(5)</sub>    | 1.019                                                                             | 1.017                | 1.018                                                                               | 1.012                | 1.023                                                                               | 1.038                |
| R <sub>C-H(6)</sub>    | 1.095                                                                             | 1.083                | 1.100                                                                               | 1.088                | 1.096                                                                               | 1.077                |
| R <sub>O-H(4)</sub>    | -                                                                                 | -                    | -                                                                                   | -                    | 0.973                                                                               | 0.967                |
| ∠ <sub>H(4)NC</sub>    | 113.0                                                                             | 110.3                | 111.4                                                                               | 111.3                | 54.2                                                                                | 56.5                 |
| ∠ <sub>H(5)NC</sub>    | 111.1                                                                             | 112.2                | 109.8                                                                               | 109.8                | 106.9                                                                               | 107.2                |
| ∠ <sub>H(4)NH(5)</sub> | 108.6                                                                             | 107.9                | 108.3                                                                               | 108.5                | 101.3                                                                               | 109.3                |
| ∠ <sub>NCO</sub>       | 113.1                                                                             | 112.2                | 111.4                                                                               | 111.6                | 114.2                                                                               | 113.3                |
| ∠ <sub>NCH(6)</sub>    | 117.8                                                                             | 118.3                | 115.2                                                                               | 115.3                | 116.2                                                                               | 115.9                |
| ∠ <sub>H(4)NCO</sub>   | -78.1                                                                             | -50.2                | -57.9                                                                               | -56.7                | 12.5                                                                                | -0.6                 |
| ∠ <sub>H(5)NCO</sub>   | 44.2                                                                              | 70.2                 | -177.8                                                                              | -176.9               | 104.4                                                                               | -102.7               |
| ∠ <sub>H(4)NCH</sub>   | -178.7                                                                            | 171.6                | 172.7                                                                               | 173.7                | 144.9                                                                               | -134.8               |
| ∠ <sub>H(5)NCH</sub>   | 59.0                                                                              | -68.1                | 52.8                                                                                | 53.4                 | 123.3                                                                               | -123.1               |

**Table S1b**<sup>†</sup> The equilibrium and transition structures (Z-matrices), as well as the vibrational frequencies and vertical excitation energies ( $E^{\text{Ex}}$ ), obtained based on CASPT2(6,9) geometry optimizations using the aug-cc-pVDZ and aug-cc-pVTZ basis sets. Distances, angles and vibrational frequencies are in Å, degree and  $\text{cm}^{-1}$ , respectively. The scaling factor for the vibrational frequencies is 0.9434. → = vibrational normal mode of the imaginary frequency.

| Structures                                                                                                      | Z-matrix    |   |                                            |   |       |   |        | Vibrational frequencies |             |
|-----------------------------------------------------------------------------------------------------------------|-------------|---|--------------------------------------------|---|-------|---|--------|-------------------------|-------------|
|                                                                                                                 |             |   |                                            |   |       |   |        | aug-cc-pVDZ             | aug-cc-pVTZ |
| <b>G1-[1]<sup>eq</sup></b><br>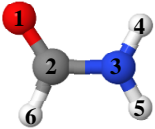 | aug-cc-pVDZ |   | $E^{\text{Ex}} = 6.55 \text{ eV (189 nm)}$ |   |       |   | 292    | 210                     |             |
|                                                                                                                 | O           |   |                                            |   |       |   | 525    | 533                     |             |
|                                                                                                                 | C           | 1 | 1.223                                      |   |       |   | 572    | 586                     |             |
|                                                                                                                 | N           | 2 | 1.370                                      | 1 | 124.6 |   | 957    | 988                     |             |
|                                                                                                                 | H(4)        | 3 | 1.013                                      | 2 | 117.6 | 1 | -11.8  | 1006                    | 1009        |
|                                                                                                                 | H(5)        | 3 | 1.010                                      | 2 | 119.4 | 1 | -165.9 | 1203                    | 1214        |
|                                                                                                                 | H(6)        | 2 | 1.107                                      | 1 | 122.6 | 3 | 177.8  | 1334                    | 1352        |
|                                                                                                                 | aug-cc-pVTZ |   | $E^{\text{Ex}} = 6.74 \text{ eV (184 nm)}$ |   |       |   | 1533   | 1536                    |             |
|                                                                                                                 | O           |   |                                            |   |       |   | 1668   | 1694                    |             |
|                                                                                                                 | C           | 1 | 1.214                                      |   |       |   | 2889   | 2885                    |             |
|                                                                                                                 | N           | 2 | 1.359                                      | 1 | 124.8 |   | 3390   | 3416                    |             |
|                                                                                                                 | H(4)        | 3 | 1.006                                      | 2 | 118.5 | 1 | -8.3   | 3534                    | 3554        |
|                                                                                                                 | H(5)        | 3 | 1.002                                      | 2 | 120.3 | 1 | -170.4 |                         |             |
|                                                                                                                 | H(6)        | 2 | 1.097                                      | 1 | 122.6 | 3 | 178.4  |                         |             |

**Table S1b<sup>†</sup>** (Cont.)

| Structures                                                                                                          | Z-matrix                                               |   |       |   |       |   | Vibrational frequencies |             |      |
|---------------------------------------------------------------------------------------------------------------------|--------------------------------------------------------|---|-------|---|-------|---|-------------------------|-------------|------|
|                                                                                                                     |                                                        |   |       |   |       |   | aug-cc-pVDZ             | aug-cc-pVTZ |      |
| <p><b>G6-[1]<sup>eq</sup></b></p> 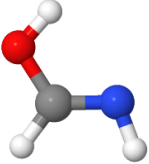 | aug-cc-pVDZ $E^{\text{Ex}} = 6.40 \text{ eV (191 nm)}$ |   |       |   |       |   | 547                     | 554         |      |
|                                                                                                                     | O                                                      |   |       |   |       |   | 571                     | 582         |      |
|                                                                                                                     | C                                                      | 1 | 1.360 |   |       |   | 782                     | 794         |      |
|                                                                                                                     | N                                                      | 2 | 1.279 | 1 | 121.7 |   |                         | 976         | 1002 |
|                                                                                                                     | H(4)                                                   | 1 | 0.973 | 2 | 105.8 | 3 | -0.1                    | 1008        | 1017 |
|                                                                                                                     | H(5)                                                   | 3 | 1.023 | 2 | 109.6 | 1 | -180.0                  | 1127        | 1126 |
|                                                                                                                     | H(6)                                                   | 2 | 1.096 | 1 | 110.7 | 3 | -180.0                  | 1292        | 1298 |
|                                                                                                                     | aug-cc-pVTZ $E^{\text{Ex}} = 6.37 \text{ eV (194 nm)}$ |   |       |   |       |   | 1311                    | 1320        |      |
|                                                                                                                     | O                                                      |   |       |   |       |   | 1585                    | 1603        |      |
|                                                                                                                     | C                                                      | 1 | 1.344 |   |       |   | 3018                    | 3018        |      |
|                                                                                                                     | N                                                      | 2 | 1.270 | 1 | 121.9 |   |                         | 3323        | 3376 |
|                                                                                                                     | H(4)                                                   | 1 | 0.969 | 2 | 106.3 | 3 | 0.1                     | 3535        | 3548 |
|                                                                                                                     | H(5)                                                   | 3 | 1.013 | 2 | 110.1 | 1 | 179.9                   |             |      |
|                                                                                                                     | H(6)                                                   | 2 | 1.084 | 1 | 110.6 | 3 | 179.9                   |             |      |

**Table S1b<sup>†</sup>** (Cont.)

| Structures                                                                                                          | Z-matrix    |   |       |   |       |   | Vibrational frequencies |             |      |
|---------------------------------------------------------------------------------------------------------------------|-------------|---|-------|---|-------|---|-------------------------|-------------|------|
|                                                                                                                     |             |   |       |   |       |   | aug-cc-pVDZ             | aug-cc-pVTZ |      |
| <p><b>E1-[2]<sup>eq</sup></b></p> 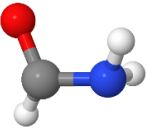 | aug-cc-pVDZ |   |       |   |       |   | 206                     | 198         |      |
|                                                                                                                     | O           |   |       |   |       |   | 361                     | 365         |      |
|                                                                                                                     | C           | 1 | 1.385 |   |       |   |                         | 694         | 668  |
|                                                                                                                     | N           | 2 | 1.415 | 1 | 113.0 |   |                         | 733         | 708  |
|                                                                                                                     | H(4)        | 3 | 1.024 | 2 | 113.0 | 1 | -78.1                   | 987         | 1012 |
|                                                                                                                     | H(5)        | 3 | 1.019 | 2 | 111.2 | 1 | 44.2                    | 1072        | 1077 |
|                                                                                                                     | H(6)        | 2 | 1.094 | 1 | 114.4 | 3 | -138.6                  | 1117        | 1126 |
|                                                                                                                     | aug-cc-pVTZ |   |       |   |       |   | 1244                    | 1263        |      |
|                                                                                                                     | O           |   |       |   |       |   | 1534                    | 1550        |      |
|                                                                                                                     | C           | 1 | 1.370 |   |       |   |                         | 3014        | 3021 |
|                                                                                                                     | N           | 2 | 1.403 | 1 | 113.3 |   |                         | 3276        | 3300 |
|                                                                                                                     | H(4)        | 3 | 1.015 | 2 | 113.9 | 1 | -82.1                   | 3402        | 3423 |
|                                                                                                                     | H(5)        | 3 | 1.010 | 2 | 111.9 | 1 | 42.8                    |             |      |
|                                                                                                                     | H(6)        | 2 | 1.083 | 1 | 114.8 | 3 | -140.0                  |             |      |

**Table S1b<sup>†</sup>** (Cont.)

| Structures                                                                                                          | Z-matrix                      |  |  |  |  |  |  | Vibrational frequencies |             |
|---------------------------------------------------------------------------------------------------------------------|-------------------------------|--|--|--|--|--|--|-------------------------|-------------|
|                                                                                                                     |                               |  |  |  |  |  |  | aug-cc-pVDZ             | aug-cc-pVTZ |
| <p><b>E2-[1]<sup>eq</sup></b></p> 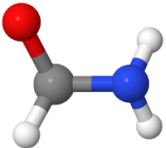 | aug-cc-pVDZ                   |  |  |  |  |  |  | 225                     | 223         |
|                                                                                                                     | O                             |  |  |  |  |  |  | 416                     | 420         |
|                                                                                                                     | C 1 1.373                     |  |  |  |  |  |  | 715                     | 700         |
|                                                                                                                     | N 2 1.423 1 111.5             |  |  |  |  |  |  | 834                     | 821         |
|                                                                                                                     | H(4) 3 1.020 2 111.4 1 -57.8  |  |  |  |  |  |  | 980                     | 989         |
|                                                                                                                     | H(5) 3 1.018 2 109.8 1 -177.8 |  |  |  |  |  |  | 1077                    | 1090        |
|                                                                                                                     | H(6) 2 1.100 1 112.3 3 130.9  |  |  |  |  |  |  | 1114                    | 1130        |
|                                                                                                                     | aug-cc-pVTZ                   |  |  |  |  |  |  | 1285                    | 1302        |
|                                                                                                                     | O                             |  |  |  |  |  |  | 1528                    | 1546        |
|                                                                                                                     | C 1 1.367                     |  |  |  |  |  |  | 2952                    | 2962        |
|                                                                                                                     | N 2 1.405 1 111.7             |  |  |  |  |  |  | 3321                    | 3346        |
|                                                                                                                     | H(4) 3 1.011 2 112.3 1 -55.3  |  |  |  |  |  |  | 3430                    | 3450        |
|                                                                                                                     | H(5) 3 1.009 2 110.8 1 -178.1 |  |  |  |  |  |  |                         |             |
|                                                                                                                     | H(6) 2 1.088 1 112.5 3 132.3  |  |  |  |  |  |  |                         |             |

**Table S1b<sup>†</sup>** (Cont.)

| Structures                                                                                                          | Z-matrix    |   |       |   |       |   | Vibrational frequencies |             |      |
|---------------------------------------------------------------------------------------------------------------------|-------------|---|-------|---|-------|---|-------------------------|-------------|------|
|                                                                                                                     |             |   |       |   |       |   | aug-cc-pVDZ             | aug-cc-pVTZ |      |
| <p><b>E6-[2]<sup>eq</sup></b></p> 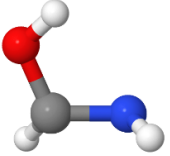 | aug-cc-pVDZ |   |       |   |       |   | 232                     | 224         |      |
|                                                                                                                     | O           |   |       |   |       |   | 422                     | 428         |      |
|                                                                                                                     | C           | 1 | 1.387 |   |       |   | 762                     | 749         |      |
|                                                                                                                     | N           | 2 | 1.441 | 1 | 114.2 |   | 957                     | 967         |      |
|                                                                                                                     | H(4)        | 1 | 0.969 | 2 | 108.3 | 3 | -26.8                   | 1054        | 1067 |
|                                                                                                                     | H(5)        | 3 | 1.034 | 2 | 107.0 | 1 | 104.3                   | 1150        | 1163 |
|                                                                                                                     | H(6)        | 2 | 1.094 | 1 | 111.7 | 3 | -134.5                  | 1158        | 1175 |
|                                                                                                                     | aug-cc-pVTZ |   |       |   |       |   | 1298                    | 1304        |      |
|                                                                                                                     | O           |   |       |   |       |   | 1733                    | 1652        |      |
|                                                                                                                     | C           | 1 | 1.374 |   |       |   | 3020                    | 3028        |      |
|                                                                                                                     | N           | 2 | 1.428 | 1 | 114.6 |   | 3155                    | 3195        |      |
|                                                                                                                     | H(4)        | 1 | 0.965 | 2 | 108.6 | 3 | -24.1                   | 3575        | 3586 |
|                                                                                                                     | H(5)        | 3 | 1.025 | 2 | 107.5 | 1 | 103.7                   |             |      |
|                                                                                                                     | H(6)        | 2 | 1.082 | 1 | 112.3 | 3 | -136.0                  |             |      |

**Table S1b<sup>†</sup>** (Cont.)

| Structures                                                                                                                                | Z-matrix                                                                                                                                                                         | Vibrational frequencies                                                                                                                       |
|-------------------------------------------------------------------------------------------------------------------------------------------|----------------------------------------------------------------------------------------------------------------------------------------------------------------------------------|-----------------------------------------------------------------------------------------------------------------------------------------------|
| <p><math>G_{k \rightarrow e}^{opt,\ddagger}</math></p> 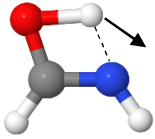  | <p>aug-cc-pVDZ</p> <p>C</p> <p>O 1 1.307</p> <p>N 1 1.316 2 108.4</p> <p>H(4) 2 1.315 1 74.7 3 0.0</p> <p>H(5) 3 1.005 1 124.8 2 -179.9</p> <p>H(6) 1 1.099 2 125.6 3 -179.8</p> | <p>-1831</p> <p>255</p> <p>807</p> <p>970</p> <p>1052</p> <p>1086</p> <p>1169</p> <p>1323</p> <p>1547</p> <p>1977</p> <p>3048</p> <p>3450</p> |
| <p><math>E_{k \rightarrow e}^{opt,\ddagger}</math></p>  | <p>aug-cc-pVDZ</p> <p>C</p> <p>N 1 1.423</p> <p>O 1 1.403 2 91.7</p> <p>H(4) 1 1.096 3 119.9 2 130.6</p> <p>H(5) 2 1.032 1 106.0 3 -89.5</p> <p>H(6) 2 1.250 1 81.7 3 7.0</p>    | <p>-2446</p> <p>587</p> <p>791</p> <p>838</p> <p>963</p> <p>1060</p> <p>1099</p> <p>1171</p> <p>1246</p> <p>1993</p> <p>2998</p> <p>3235</p>  |

**Table S1b<sup>†</sup>** (Cont.)

| Structures                                                                                                             | Z-matrix                                                                                                                                                                           | Vibrational frequencies                                                                                                                    |
|------------------------------------------------------------------------------------------------------------------------|------------------------------------------------------------------------------------------------------------------------------------------------------------------------------------|--------------------------------------------------------------------------------------------------------------------------------------------|
| <p><b>E2-[2]<sup>opt,‡</sup></b></p> 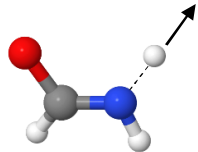 | <p>aug-cc-pVDZ</p> <p>C</p> <p>O 1 1.352</p> <p>N 1 1.277 2 119.5</p> <p>H(4) 3 1.479 1 116.0 2 -64.3</p> <p>H(5) 3 1.024 1 110.6 2 -177.4</p> <p>H(6) 1 1.104 3 129.0 2 171.2</p> | <p>-2773</p> <p>376</p> <p>523</p> <p>607</p> <p>874</p> <p>950</p> <p>986</p> <p>1126</p> <p>1297</p> <p>1578</p> <p>2930</p> <p>3335</p> |



**Table S1b<sup>†</sup>** (Cont.)

| Structures                                                                                                                          | Z-matrix                                                                                                                                                                                                                                                                                                                    |  |  |  |  |  |  |
|-------------------------------------------------------------------------------------------------------------------------------------|-----------------------------------------------------------------------------------------------------------------------------------------------------------------------------------------------------------------------------------------------------------------------------------------------------------------------------|--|--|--|--|--|--|
| <p style="text-align: center;"><b>E1-[4]</b></p> 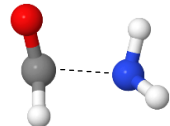  | <p style="text-align: center;">aug-cc-pVDZ</p> <p>O</p> <p>C    1        1.204</p> <p>N    2        2.000    1        101.1</p> <p>H(4) 3        1.033    2        126.9    1        95.8</p> <p>H(5) 3        1.031    2        100.5    1       -21.5</p> <p>H(6) 2        1.114    1        128.1    3        89.3</p>   |  |  |  |  |  |  |
| <p style="text-align: center;"><b>E2-[3]</b></p>  | <p style="text-align: center;">aug-cc-pVDZ</p> <p>O</p> <p>C    1        1.335</p> <p>N    2        1.281    1        123.1</p> <p>H(4) 3        2.350    2        115.4    1       -64.5</p> <p>H(5) 3        1.023    2        108.4    1       -178.4</p> <p>H(6) 2        1.105    1        108.3    3       -179.1</p> |  |  |  |  |  |  |

**Table S1b<sup>†</sup>** (Cont.)

| Structures                                                                                                         | Z-matrix                                                                                                                                                                                                                                                                     |  |  |  |  |  |  |
|--------------------------------------------------------------------------------------------------------------------|------------------------------------------------------------------------------------------------------------------------------------------------------------------------------------------------------------------------------------------------------------------------------|--|--|--|--|--|--|
| <p><b><sup>3</sup>E5-[3]</b></p> 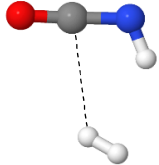 | <p>aug-cc-pVDZ</p> <p>O</p> <p>C    1        1.205</p> <p>N    2        1.383    1      169.2</p> <p>H(4) 3        1.050    2      113.7   1     107.5</p> <p>H(5) 3        3.261    2      86.0    1     102.7</p> <p>H(6) 2        2.931    1      102.1   3     102.3</p> |  |  |  |  |  |  |
| <p><b>E6-[4]</b></p>             | <p>aug-cc-pVDZ</p> <p>O</p> <p>C    1        1.900</p> <p>N    2        1.363    1      103.1</p> <p>H(4) 1        0.979    2      95.6    3      1.4</p> <p>H(5) 3        1.035    2      108.3   1     106.0</p> <p>H(6) 2        1.093    1      100.8   3    -129.9</p>  |  |  |  |  |  |  |

**Table S2<sup>†</sup>** Structures and energetic of the species obtained from the conical intersection optimizations using the SA-CPMCSCF method with the 6-31G(d) basis set.  $(S_0/S_1)^{opt}$  and  $(S_0/T_1)^{opt}$  = conical intersections of the  $S_0$  and  $S_1$  and  $S_0$  and  $T_1$ , respectively (minimum energy crossing point); (...) = dissociation channels;  $(S_0/S_1)^{sp}$  and  $(S_0/T_1)^{sp}$  = single point calculation using the structures obtained from the relax-scan potential energy curves and the SA-CPMCSCF/6-31G(d) method.

| SA-CPMCSCF/6-31G(d) |                                                                                                                   |                                                  |                                                  |                       |                                        |                      |
|---------------------|-------------------------------------------------------------------------------------------------------------------|--------------------------------------------------|--------------------------------------------------|-----------------------|----------------------------------------|----------------------|
| Channel             | Structure                                                                                                         | R/ Å                                             | Intersection (§)                                 | E <sup>Tot</sup> / au |                                        | ΔE <sup>§</sup> / eV |
|                     |                                                                                                                   |                                                  |                                                  | S <sub>0</sub> state  | S <sub>1</sub> or T <sub>1</sub> state |                      |
| (1)                 | 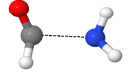<br><b>E1-[4]§</b>               | R <sub>C-N</sub> =2.22                           | (S <sub>0</sub> /S <sub>1</sub> ) <sup>opt</sup> | -168.8385655          | -168.8383818                           | 0.0050               |
|                     | <br><b><sup>3</sup>E1-[4]§</b>   | R <sub>C-N</sub> =3.44                           | (S <sub>0</sub> /T <sub>1</sub> ) <sup>opt</sup> | -168.8353159          | -168.8347231                           | 0.0161               |
| (2)                 | <br><b>E2-[3]§</b>               | R <sub>N-H(4)</sub> =3.85                        | (S <sub>0</sub> /S <sub>1</sub> ) <sup>opt</sup> | -168.8267912          | -168.8266744                           | 0.0032               |
|                     | <br><b><sup>3</sup>E2-[3]§</b>   | R <sub>N-H(4)</sub> =3.74                        | (S <sub>0</sub> /T <sub>1</sub> ) <sup>opt</sup> | -168.8299766          | -168.8299381                           | 0.0010               |
| (3)                 | <br><b>E3-[3]§</b>               | R <sub>C-H(6)</sub> =1.09                        | (S <sub>0</sub> /S <sub>1</sub> ) <sup>opt</sup> | -168.8149178          | -168.8148806                           | 0.0010               |
|                     | <br><b><sup>3</sup>E3-[3]§</b> | R <sub>C-H(6)</sub> =1.08                        | (S <sub>0</sub> /T <sub>1</sub> ) <sup>opt</sup> | -168.9615585          | -168.8824506                           | 2.1526               |
| (5)                 | <br><b>E5-[3]§</b>             | R <sub>C-H(6)</sub> =3.09                        | (S <sub>0</sub> /S <sub>1</sub> ) <sup>sp</sup>  | -169.1728445          | -169.1742238                           | 0.0375               |
|                     | <br><b><sup>3</sup>E5-[3]§</b> | R <sub>C-H(6)</sub> =3.22                        | (S <sub>0</sub> /T <sub>1</sub> ) <sup>sp</sup>  | -169.1583382          | -169.1600598                           | 0.0468               |
| (6)                 | <br><b>E6-[5]§</b>             | R <sub>C-O</sub> =3.68<br>R <sub>N-O</sub> =3.03 | (S <sub>0</sub> /S <sub>1</sub> ) <sup>sp</sup>  | -169.2068081          | -169.205497                            | 0.0357               |
|                     | <br><b><sup>3</sup>E6-[5]§</b> | R <sub>C-O</sub> =3.76<br>R <sub>N-O</sub> =3.06 | (S <sub>0</sub> /T <sub>1</sub> ) <sup>opt</sup> | -168.8382159          | -168.8383788                           | 0.0044               |

**Table S3<sup>†</sup>** Rate constants (k), enthalpies of activation ( $\Delta H^{\circ\dagger}$ ) and Gibbs free energy barriers ( $\Delta G^{\circ\dagger}$ ) for the C–N dissociation in the S<sub>1</sub> state (Channel (1)), obtained based on the transition state theory and potential energy curves. Energies, rate constants and temperatures are in kJ mol<sup>-1</sup>, s<sup>-1</sup> and K, respectively.

| Channel (1)                                                                       | $\Delta E^\ddagger$ | $\Delta H^{\circ\dagger}$ | $T_c$ | $T_s$ | T    | $k^{\text{Class}}$    | $k^{\text{Q-vib}}$    | $k^{\text{S-Wig}}$    | $k^{\text{F-Wig}}$    | $\Delta G^{\circ\dagger}$ |
|-----------------------------------------------------------------------------------|---------------------|---------------------------|-------|-------|------|-----------------------|-----------------------|-----------------------|-----------------------|---------------------------|
|                                                                                   |                     |                           |       |       | 200  | $1.86 \times 10^{-8}$ | $2.08 \times 10^{-7}$ | $2.28 \times 10^{-7}$ | $2.29 \times 10^{-7}$ | 74                        |
|                                                                                   |                     |                           |       |       | 450  | $1.07 \times 10^4$    | $2.15 \times 10^4$    | $2.18 \times 10^4$    | $2.18 \times 10^4$    | 74                        |
| <b>E1-[2]<sup>eq</sup> → E1-[3]<sup>‡</sup></b>                                   | 58                  | 76                        | 48    |       | 1200 | $8.08 \times 10^9$    | $9.19 \times 10^9$    | $9.21 \times 10^9$    | $9.21 \times 10^9$    | 79                        |
|                                                                                   |                     |                           |       |       | 1328 | $1.77 \times 10^{10}$ | $1.97 \times 10^{10}$ | $1.97 \times 10^{10}$ | $1.97 \times 10^{10}$ | 80                        |
| 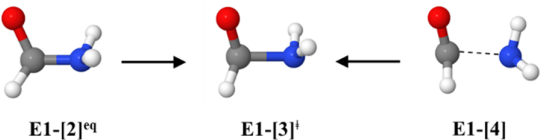 |                     |                           |       | 555   | 4500 | $3.12 \times 10^{12}$ | $3.16 \times 10^{12}$ | $3.16 \times 10^{12}$ | $3.16 \times 10^{12}$ | 127                       |
|                                                                                   |                     |                           |       |       | 200  | $3.85 \times 10^{-8}$ | $2.69 \times 10^{-5}$ | $3.71 \times 10^{-5}$ | $4.07 \times 10^{-5}$ | 66                        |
|                                                                                   |                     |                           |       |       | 450  | $6.65 \times 10^3$    | $6.36 \times 10^4$    | $6.83 \times 10^4$    | $6.86 \times 10^4$    | 70                        |
| <b>E1-[3]<sup>‡</sup> ← E1-[4]</b>                                                | 55                  | 65                        | 96    |       | 1200 | $2.76 \times 10^9$    | $4.28 \times 10^9$    | $4.32 \times 10^9$    | $4.33 \times 10^9$    | 87                        |
|                                                                                   |                     |                           |       |       | 1328 | $1.99 \times 10^9$    | $2.71 \times 10^9$    | $2.72 \times 10^9$    | $2.72 \times 10^9$    | 102                       |
|                                                                                   |                     |                           |       |       | 4500 | $5.01 \times 10^{11}$ | $5.16 \times 10^{11}$ | $5.16 \times 10^{11}$ | $5.16 \times 10^{11}$ | 195                       |

$T_c$  = crossover temperature; <sup>eq</sup> = equilibrium structure;  $k^{\text{Class}}$  = rate constant obtained from classical TST;  $k^{\text{Q-vib}}$  = rate constant obtained with quantized vibrations including the zero-point vibrational energy;  $k^{\text{S-Wig}}$  = rate constant obtained with quantized vibrations and tunneling correction through the simplified Wigner correction to the second order;  $k^{\text{F-Wig}}$  = full Wigner-corrected rate constant at T above  $T_c$ ;  $T_s$  = temperature at which the forward is spontaneous;  $\Delta E^\ddagger$  = energy barrier with respect to the precursor.

**Table S4<sup>†</sup>** Rate constants (k), enthalpies of activation ( $\Delta H^{\ddagger}$ ) and Gibbs free energy barriers ( $\Delta G^{\ddagger}$ ) for the N–H dissociation in the  $S_1$  state (Channel (2)), obtained based on the transition state theory and potential energy curves. Energies, rate constants and temperatures are in  $\text{kJ mol}^{-1}$ ,  $\text{s}^{-1}$  and K, respectively.

| Channel (2)                                     | $\Delta E^{\ddagger}$ | $\Delta H^{\circ,\ddagger}$ | $T_c$ | $T_s$ | T    | $k^{\text{Class}}$     | $k^{\text{Q-vib}}$     | $k^{\text{S-Wig}}$     | $k^{\text{F-Wig}}$    | $\Delta G^{\circ,\ddagger}$ |
|-------------------------------------------------|-----------------------|-----------------------------|-------|-------|------|------------------------|------------------------|------------------------|-----------------------|-----------------------------|
|                                                 |                       |                             |       |       | 200  | $1.03 \times 10^{-23}$ | $1.62 \times 10^{-19}$ | $1.05 \times 10^{-18}$ | -                     | 120                         |
|                                                 |                       |                             |       |       | 450  | $2.59 \times 10^{-3}$  | $7.32 \times 10^{-2}$  | $1.52 \times 10^{-1}$  | $3.36 \times 10^{-1}$ | 122                         |
| <b>E2-[1]<sup>eq</sup> → E2-[2]<sup>‡</sup></b> | 153                   | 123                         | 365   |       | 1200 | $4.11 \times 10^7$     | $8.22 \times 10^7$     | $9.48 \times 10^7$     | $9.62 \times 10^7$    | 126                         |
|                                                 |                       |                             |       |       | 1328 | $1.15 \times 10^8$     | $2.05 \times 10^8$     | $2.89 \times 10^8$     | $3.21 \times 10^8$    | 130                         |
|                                                 |                       |                             |       |       | 4500 | $1.34 \times 10^{12}$  | $1.42 \times 10^{12}$  | $1.47 \times 10^{12}$  | $1.47 \times 10^{12}$ | 157                         |
|                                                 |                       |                             |       |       | 200  | $3.68 \times 10^3$     | $8.58 \times 10^2$     | $5.26 \times 10^3$     | -                     | 37                          |
|                                                 |                       |                             |       |       | 450  | $3.48 \times 10^6$     | $2.44 \times 10^6$     | $4.91 \times 10^6$     | $9.62 \times 10^6$    | 57                          |
| <b>E2-[2]<sup>‡</sup> ← E2-[3]</b>              | 38                    | 23                          | 353   |       | 1200 | $1.07 \times 10^8$     | $1.01 \times 10^8$     | $1.16 \times 10^8$     | $1.17 \times 10^8$    | 124                         |
|                                                 |                       |                             |       |       | 1328 | $6.14 \times 10^7$     | $5.88 \times 10^7$     | $8.28 \times 10^7$     | $9.20 \times 10^7$    | 144                         |
|                                                 |                       |                             |       |       | 4500 | $4.47 \times 10^8$     | $4.45 \times 10^8$     | $4.61 \times 10^8$     | $4.61 \times 10^8$    | 459                         |

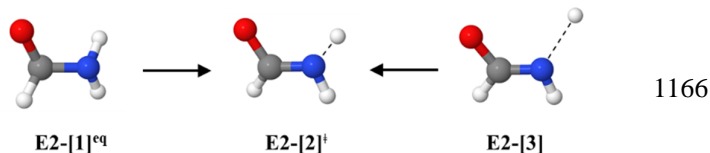

$T_c$  = crossover temperature; <sup>eq</sup> = equilibrium structure;  $k^{\text{Class}}$  = rate constant obtained from classical TST;  $k^{\text{Q-vib}}$  = rate constant obtained with quantized vibrations including the zero-point vibrational energy;  $k^{\text{S-Wig}}$  = rate constant obtained with quantized vibrations and tunneling correction through the simplified Wigner correction to the second order;  $k^{\text{F-Wig}}$  = full Wigner-corrected rate constant at T above  $T_c$ ;  $T_s$  = temperature at which the forward is spontaneous;  $\Delta E^{\ddagger}$  = energy barrier with respect to the precursor.

**Table S5<sup>†</sup>** Rate constants (k), enthalpies of activation ( $\Delta H^{\circ,\ddagger}$ ) and Gibbs free energy barriers ( $\Delta G^{\circ,\ddagger}$ ) for the C–H dissociation in the S<sub>1</sub> state (Channel (3)), obtained based on the transition state theory and potential energy curves. Energies, rate constants and temperatures are in kJ mol<sup>-1</sup>, s<sup>-1</sup> and K, respectively.

| Channel (3)            | $\Delta E^{\ddagger}$ | $\Delta H^{\circ,\ddagger}$ | T <sub>c</sub> | T    | k <sup>Class</sup>     | k <sup>Q-vib</sup>     | k <sup>S-Wig</sup>     | k <sup>F-Wig</sup>    | $\Delta G^{\circ,\ddagger}$ |
|------------------------|-----------------------|-----------------------------|----------------|------|------------------------|------------------------|------------------------|-----------------------|-----------------------------|
|                        |                       |                             |                | 200  | $7.03 \times 10^{-36}$ | $4.63 \times 10^{-32}$ | $1.85 \times 10^{-31}$ | -                     | 168                         |
|                        |                       |                             |                | 450  | $1.55 \times 10^{-8}$  | $2.66 \times 10^{-7}$  | $4.23 \times 10^{-7}$  | $5.27 \times 10^{-7}$ | 168                         |
| <b>E3-[1] → E3-[3]</b> | 166                   | 171                         | 269            | 1200 | $7.30 \times 10^5$     | $1.25 \times 10^6$     | $1.35 \times 10^6$     | $1.36 \times 10^6$    | 168                         |
|                        |                       |                             |                | 1328 | $2.86 \times 10^7$     | $4.55 \times 10^7$     | $4.77 \times 10^7$     | $4.78 \times 10^7$    | 147                         |
|                        |                       |                             |                | 4500 | $7.30 \times 10^5$     | $1.25 \times 10^6$     | $1.35 \times 10^6$     | $1.36 \times 10^6$    | 146                         |

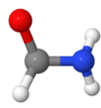

**E3-[1]**



**E3-[2]**



**E3-[3]**

T<sub>c</sub> = crossover temperature; k<sup>Class</sup> = rate constant obtained from classical TST; k<sup>Q-vib</sup> = rate constant obtained with quantized vibrations including the zero-point vibrational energy; k<sup>S-Wig</sup> = rate constant obtained with quantized vibrations and tunneling correction through the simplified Wigner correction to the second order; k<sup>F-Wig</sup> = full Wigner-corrected rate constant at T above T<sub>c</sub>;  $\Delta E^{\ddagger}$  = energy barrier with respect to the precursor.

**Table S6<sup>†</sup>** Rate constants ( $k$ ), enthalpies of activation ( $\Delta H^{\ddagger}$ ) and Gibbs free energy barriers ( $\Delta G^{\ddagger}$ ) for the unimolecular isomerization of the C–N dissociated structure in the  $S_0$  state (Channel (4)), obtained based on the transition state theory and potential energy curves. Energies, rate constants and temperatures are in  $\text{kJ mol}^{-1}$ ,  $\text{s}^{-1}$  and K, respectively.

| Channel (4)                                                                       | $\Delta E^{\ddagger}$ | $\Delta H^{\ddagger}$ | $T_c$ | T    | $k^{\text{Class}}$     | $k^{\text{Q-vib}}$     | $k^{\text{S-Wig}}$     | $k^{\text{F-Wig}}$     | $\Delta G^{\ddagger}$ |
|-----------------------------------------------------------------------------------|-----------------------|-----------------------|-------|------|------------------------|------------------------|------------------------|------------------------|-----------------------|
|                                                                                   |                       |                       |       | 200  | $3.33 \times 10^{-12}$ | $1.27 \times 10^{-10}$ | $8.72 \times 10^{-10}$ | -                      | 86                    |
|                                                                                   |                       |                       |       | 450  | $2.20 \times 10^2$     | $7.16 \times 10^2$     | $1.54 \times 10^3$     | $3.88 \times 10^3$     | 87                    |
| <b>G4-[1] <math>\rightarrow</math> G4-[2]<sup>‡</sup></b>                         | 95                    | 88                    | 377   | 1200 | $1.78 \times 10^9$     | $2.26 \times 10^9$     | $2.63 \times 10^9$     | $2.68 \times 10^9$     | 93                    |
|                                                                                   |                       |                       |       | 1328 | $4.47 \times 10^9$     | $5.45 \times 10^9$     | $6.17 \times 10^9$     | $6.25 \times 10^9$     | 94                    |
|                                                                                   |                       |                       |       | 4500 | $1.96 \times 10^{12}$  | $1.99 \times 10^{12}$  | $2.02 \times 10^{12}$  | $2.02 \times 10^{12}$  | 144                   |
| 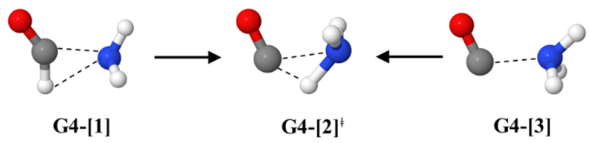 |                       |                       |       | 200  | $4.30 \times 10^{-48}$ | $5.64 \times 10^{-45}$ | $4.09 \times 10^{-44}$ | -                      | 218                   |
|                                                                                   |                       |                       |       | 450  | $4.02 \times 10^{-16}$ | $5.46 \times 10^{-15}$ | $1.22 \times 10^{-14}$ | $3.65 \times 10^{-14}$ | 235                   |
| <b>G4-[2]<sup>‡</sup> <math>\leftarrow</math> G4-[3]</b>                          | 209                   | 207                   | 389   | 1200 | $3.88 \times 10^0$     | $6.86 \times 10^0$     | $8.05 \times 10^0$     | $8.21 \times 10^0$     | 289                   |
|                                                                                   |                       |                       |       | 1328 | $8.24 \times 10^1$     | $1.32 \times 10^2$     | $1.49 \times 10^2$     | $1.51 \times 10^2$     | 288                   |
|                                                                                   |                       |                       |       | 4500 | $4.57 \times 10^7$     | $4.79 \times 10^7$     | $4.85 \times 10^7$     | $4.85 \times 10^7$     | 542                   |

$T_c$  = crossover temperature;  $k^{\text{Class}}$  = rate constant obtained from classical TST;  $k^{\text{Q-vib}}$  = rate constant obtained with quantized vibrations including the zero-point vibrational energy;  $k^{\text{S-Wig}}$  = rate constant obtained with quantized vibrations and tunneling correction through the simplified Wigner correction to the second order;  $k^{\text{F-Wig}}$  = full Wigner-corrected rate constant at T above  $T_c$ ;  $\Delta E^{\ddagger}$  = energy barrier with respect to the precursor.



**Table S7<sup>†</sup>** Rate constants (k), enthalpies of activation ( $\Delta H^{\circ\dagger}$ ) and Gibbs free energy barriers ( $\Delta G^{\circ\dagger}$ ) for formation HNCO and H<sub>2</sub> (structure **G5-[3]**) (Channel (5)), obtained based on the transition state theory and potential energy curves. Energies, rate constants and temperatures are in kJ mol<sup>-1</sup>, s<sup>-1</sup> and K, respectively.

| Channel (5)                        | $\Delta E^{\ddagger}$ | $\Delta H^{\circ\dagger}$ | $T_c$ | $T_s$ | T    | $k^{\text{Class}}$     | $k^{\text{Q-vib}}$     | $k^{\text{S-Wig}}$     | $k^{\text{F-Wig}}$     | $\Delta G^{\circ\dagger}$ |
|------------------------------------|-----------------------|---------------------------|-------|-------|------|------------------------|------------------------|------------------------|------------------------|---------------------------|
|                                    |                       |                           |       |       | 200  | $1.33 \times 10^{-64}$ | $1.35 \times 10^{-61}$ | $6.14 \times 10^{-61}$ | -                      | 281                       |
|                                    |                       |                           |       |       | 450  | $2.35 \times 10^{-21}$ | $2.74 \times 10^{-20}$ | $4.67 \times 10^{-20}$ | $6.36 \times 10^{-20}$ | 280                       |
| <b>G5-[1] → G5-[2]<sup>‡</sup></b> | 293                   | 285                       | 294   |       | 1200 | $9.86 \times 10^0$     | $1.74 \times 10^1$     | $1.90 \times 10^1$     | $1.91 \times 10^1$     | 279                       |
|                                    |                       |                           |       |       | 1328 | $2.36 \times 10^2$     | $3.72 \times 10^2$     | $4.02 \times 10^2$     | $4.04 \times 10^2$     | 276                       |
|                                    |                       |                           |       |       | 4500 | $2.96 \times 10^{10}$  | $3.10 \times 10^{10}$  | $3.12 \times 10^{10}$  | $3.12 \times 10^{10}$  | 300                       |
|                                    |                       |                           |       | 206   | 200  | $6.85 \times 10^{-61}$ | $6.51 \times 10^{-61}$ | $2.95 \times 10^{-61}$ | -                      | 283                       |
|                                    |                       |                           |       |       | 450  | $2.57 \times 10^{-21}$ | $1.81 \times 10^{-21}$ | $3.07 \times 10^{-21}$ | $4.10 \times 10^{-21}$ | 290                       |
| <b>G5-[2]<sup>‡</sup> ← G5-[3]</b> | 297                   | 278                       | 292   |       | 1200 | $1.58 \times 10^{-1}$  | $1.66 \times 10^{-1}$  | $1.82 \times 10^{-1}$  | $1.83 \times 10^{-1}$  | 326                       |
|                                    |                       |                           |       |       | 1328 | $1.69 \times 10^{-1}$  | $1.75 \times 10^{-1}$  | $1.89 \times 10^{-1}$  | $1.90 \times 10^{-1}$  | 360                       |
|                                    |                       |                           |       |       | 4500 | $3.09 \times 10^7$     | $3.12 \times 10^7$     | $3.14 \times 10^7$     | $3.14 \times 10^7$     | 558                       |

$T_c$  = crossover temperature;  $k^{\text{Class}}$  = rate constant obtained from classical TST;  $k^{\text{Q-vib}}$  = rate constant obtained with quantized vibrations including the zero-point vibrational energy;  $k^{\text{S-Wig}}$  = rate constant obtained with quantized vibrations and tunneling correction through the simplified Wigner correction to the second order;  $k^{\text{F-Wig}}$  = full Wigner-corrected rate constant at T above  $T_c$ ;  $T_s$  = temperature at which the forward is spontaneous;  $\Delta E^{\ddagger}$  = energy barrier with respect to the precursor.

**Table S8<sup>†</sup>** Rate constants (k), enthalpies of activation ( $\Delta H^{\ddagger}$ ) and Gibbs free energy barriers ( $\Delta G^{\ddagger}$ ) for formation HNCO and H<sub>2</sub> (structure <sup>3</sup>E5-[3]) in the T<sub>1</sub> state (Channel (5)), obtained based on the transition state theory and potential energy curves. Energies, rate constants and temperatures are in kJ mol<sup>-1</sup>, s<sup>-1</sup> and K, respectively.

| Channel (5)                                                | $\Delta E^{\ddagger}$ | $\Delta H^{\ddagger}$ | T <sub>c</sub> | T <sub>s</sub> | T    | k <sup>Class</sup>     | k <sup>Q-vib</sup>     | k <sup>S-Wig</sup>     | k <sup>F-Wig</sup>    | $\Delta G^{\ddagger}$ |
|------------------------------------------------------------|-----------------------|-----------------------|----------------|----------------|------|------------------------|------------------------|------------------------|-----------------------|-----------------------|
|                                                            |                       |                       |                |                | 200  | $4.42 \times 10^{-46}$ | $3.36 \times 10^{-46}$ | $2.74 \times 10^{-41}$ | -                     | 207                   |
|                                                            |                       |                       |                |                | 450  | $5.25 \times 10^{-11}$ | $8.06 \times 10^{-10}$ | $1.95 \times 10^{-9}$  | $1.04 \times 10^{-8}$ | 190                   |
| <b>E1-[4] → <sup>3</sup>E5-[2]<sup>‡</sup></b>             | 236                   | 225                   | 417            |                | 1200 | $1.81 \times 10^7$     | $2.95 \times 10^7$     | $3.54 \times 10^7$     | $3.63 \times 10^7$    | 136                   |
|                                                            |                       |                       |                |                | 1328 | $1.87 \times 10^7$     | $2.79 \times 10^8$     | $3.25 \times 10^8$     | $3.31 \times 10^8$    | 127                   |
|                                                            |                       |                       |                |                | 4500 | $9.42 \times 10^{14}$  | $9.78 \times 10^{14}$  | $9.91 \times 10^{14}$  | $9.92 \times 10^{14}$ | -87                   |
|                                                            |                       |                       |                | 1577           | 200  | $6.01 \times 10^{-4}$  | $1.11 \times 10^{-3}$  | $9.07 \times 10^{-3}$  | -                     | 60                    |
|                                                            |                       |                       |                |                | 450  | $5.43 \times 10^4$     | $8.22 \times 10^4$     | $2.12 \times 10^5$     | $3.80 \times 10^6$    | 66                    |
| <b><sup>3</sup>E5-[2]<sup>‡</sup> ← <sup>3</sup>E5-[3]</b> | 55                    | 56                    | 417            |                | 1200 | $8.26 \times 10^7$     | $1.04 \times 10^8$     | $1.53 \times 10^8$     | $1.76 \times 10^8$    | 77                    |
|                                                            |                       |                       |                |                | 1328 | $3.22 \times 10^9$     | $3.61 \times 10^9$     | $4.20 \times 10^9$     | $4.27 \times 10^9$    | 99                    |
|                                                            |                       |                       |                |                | 4500 | $1.26 \times 10^{11}$  | $1.27 \times 10^{11}$  | $1.29 \times 10^{11}$  | $1.29 \times 10^{11}$ | 247                   |

T<sub>c</sub> = crossover temperature; k<sup>Class</sup> = rate constant obtained from classical TST; k<sup>Q-vib</sup> = rate constant obtained with quantized vibrations including the zero-point vibrational energy; k<sup>S-Wig</sup> = rate constant obtained with quantized vibrations and tunneling correction through the simplified Wigner correction to the second order; k<sup>F-Wig</sup> = full Wigner-corrected rate constant at T above T<sub>c</sub>; T<sub>s</sub> = temperature at which the forward is spontaneous;  $\Delta E^{\ddagger}$  = energy barrier with respect to the precursor.

**Table S9<sup>†</sup>** Rate constants (k), enthalpies of activation ( $\Delta H^{\ddagger}$ ) and Gibbs free energy barriers ( $\Delta G^{\ddagger}$ ) for formation of CO–NH–H<sub>2</sub> van der Waals cluster (structure **E5-[3]**) (Channel (5)), obtained based on the transition state theory and potential energy curves. Energies, rate constants and temperatures are in kJ mol<sup>-1</sup>, s<sup>-1</sup> and K, respectively.

| Channel (5)                        | $\Delta E^{\ddagger}$ | $\Delta H^{\ddagger}$ | $T_c$ | $T_s$ | T    | $k^{\text{Class}}$     | $k^{\text{Q-vib}}$     | $k^{\text{S-Wig}}$     | $k^{\text{F-Wig}}$     | $\Delta G^{\ddagger}$ |
|------------------------------------|-----------------------|-----------------------|-------|-------|------|------------------------|------------------------|------------------------|------------------------|-----------------------|
|                                    |                       |                       |       |       | 200  | $1.87 \times 10^{-39}$ | $2.63 \times 10^{-42}$ | $1.52 \times 10^{-41}$ | -                      | 207                   |
|                                    |                       |                       |       |       | 450  | $3.58 \times 10^{-9}$  | $9.51 \times 10^{-11}$ | $1.85 \times 10^{-10}$ | $3.27 \times 10^{-10}$ | 198                   |
| <b>E5-[1] → E5-[2]<sup>‡</sup></b> | 204                   | 219                   | 340   |       | 1200 | $4.95 \times 10^6$     | $1.23 \times 10^6$     | $1.39 \times 10^6$     | $1.41 \times 10^6$     | 167                   |
|                                    |                       |                       |       |       | 1328 | $3.07 \times 10^7$     | $1.08 \times 10^7$     | $1.20 \times 10^7$     | $1.21 \times 10^7$     | 162                   |
|                                    |                       |                       |       |       | 4500 | $2.27 \times 10^{13}$  | $1.90 \times 10^{13}$  | $1.92 \times 10^{13}$  | $1.92 \times 10^{13}$  | 60                    |
|                                    |                       |                       |       | 990   | 200  | $3.65 \times 10^{-4}$  | $1.35 \times 10^{-15}$ | $7.80 \times 10^{-15}$ | -                      | 105                   |
|                                    |                       |                       |       |       | 450  | $9.61 \times 10^2$     | $6.07 \times 10^{-2}$  | $1.17 \times 10^{-1}$  | $2.08 \times 10^{-1}$  | 122                   |
| <b>E5-[2]<sup>‡</sup> ← E5-[3]</b> | 45                    | 92                    | 340   |       | 1200 | $1.56 \times 10^6$     | $1.27 \times 10^5$     | $1.44 \times 10^5$     | $1.45 \times 10^5$     | 190                   |
|                                    |                       |                       |       |       | 1328 | $2.36 \times 10^6$     | $2.75 \times 10^5$     | $3.05 \times 10^5$     | $3.07 \times 10^5$     | 203                   |
|                                    |                       |                       |       |       | 4500 | $3.98 \times 10^7$     | $3.06 \times 10^7$     | $3.09 \times 10^7$     | $3.09 \times 10^7$     | 559                   |

$T_c$  = crossover temperature;  $k^{\text{Class}}$  = rate constant obtained from classical TST;  $k^{\text{Q-vib}}$  = rate constant obtained with quantized vibrations including the zero-point vibrational energy;  $k^{\text{S-Wig}}$  = rate constant obtained with quantized vibrations and tunneling correction through the simplified Wigner correction to the second order;  $k^{\text{F-Wig}}$  = full Wigner-corrected rate constant at T above  $T_c$ ;  $T_s$  = temperature at which the forward is spontaneous;  $\Delta E^{\ddagger}$  = energy barrier with respect to the precursor.

**Table S10<sup>†</sup>** Rate constants (k), enthalpies of activation ( $\Delta H^{\circ,\ddagger}$ ) and Gibbs free energy barriers ( $\Delta G^{\circ,\ddagger}$ ) for the dissociation of the C–O bond in formamidic acid (HCOHNH) in the S<sub>1</sub> state (Channel (6)), obtained based on the transition state theory and potential energy curves. Energies, rate constants and temperatures are in kJ mol<sup>-1</sup>, s<sup>-1</sup> and K, respectively.

| Channel (6)                                                                       | $\Delta E^{\ddagger}$ | $\Delta H^{\circ,\ddagger}$ | T <sub>c</sub> | T    | k <sup>Class</sup>     | k <sup>Q-vib</sup>     | k <sup>S-Wig</sup>     | k <sup>F-Wig</sup>    | $\Delta G^{\circ,\ddagger}$ |
|-----------------------------------------------------------------------------------|-----------------------|-----------------------------|----------------|------|------------------------|------------------------|------------------------|-----------------------|-----------------------------|
|                                                                                   |                       |                             |                | 200  | $1.29 \times 10^{-22}$ | $4.54 \times 10^{-22}$ | $1.22 \times 10^{-21}$ | -                     | 130                         |
|                                                                                   |                       |                             |                | 450  | $7.33 \times 10^{-3}$  | $7.23 \times 10^{-3}$  | $9.63 \times 10^{-3}$  | $1.03 \times 10^{-2}$ | 130                         |
| <b>E6-[2]<sup>eq</sup> → E6-[4]</b>                                               | 133                   | 133                         | 202            | 1200 | $5.52 \times 10^7$     | $5.09 \times 10^7$     | $5.33 \times 10^7$     | $5.33 \times 10^7$    | 131                         |
| 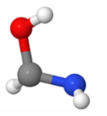 |                       |                             |                | 1328 | $2.05 \times 10^8$     | $1.91 \times 10^8$     | $1.99 \times 10^8$     | $1.99 \times 10^8$    | 131                         |
|  |                       |                             |                | 4500 | $1.22 \times 10^{12}$  | $1.21 \times 10^{12}$  | $1.22 \times 10^{12}$  | $1.22 \times 10^{12}$ | 162                         |
|  |                       |                             |                |      |                        |                        |                        |                       |                             |

T<sub>c</sub> = crossover temperature; <sup>eq</sup> = equilibrium structure; k<sup>Class</sup> = rate constant obtained from classical TST; k<sup>Q-vib</sup> = rate constant obtained with quantized vibrations including the zero-point vibrational energy; k<sup>S-Wig</sup> = rate constant obtained with quantized vibrations and tunneling correction through the simplified Wigner correction to the second order; k<sup>F-Wig</sup> = full Wigner-corrected rate constant at T above T<sub>c</sub>;  $\Delta E^{\ddagger}$  = energy barrier with respect to the precursor.

**Table S11<sup>†</sup>** Rate constants (k), enthalpies of activation ( $\Delta H^{\circ,\ddagger}$ ) and Gibbs free energy barriers ( $\Delta G^{\circ,\ddagger}$ ) for the keto-enol tautomerism of HCONH<sub>2</sub> in the S<sub>0</sub> state (structure **G1-[1]<sup>eq</sup>** → **G6-[1]<sup>eq</sup>**), obtained based on the transition state theory and the optimize transition geometry (**G<sub>k→e</sub><sup>opt,‡</sup>**). Energies, rate constants and temperatures are in kJ mol<sup>-1</sup>, s<sup>-1</sup> and K, respectively.

|                                                                                   | $\Delta E^{\ddagger}$ | $\Delta H^{\circ,\ddagger}$ | T <sub>c</sub> | T    | k <sup>Class</sup>     | k <sup>Q-vib</sup>     | k <sup>S-Wig</sup>     | k <sup>F-Wig</sup>    | $\Delta G^{\circ,\ddagger}$ |
|-----------------------------------------------------------------------------------|-----------------------|-----------------------------|----------------|------|------------------------|------------------------|------------------------|-----------------------|-----------------------------|
|                                                                                   |                       |                             |                | 200  | $2.92 \times 10^{-36}$ | $2.19 \times 10^{-33}$ | $1.87 \times 10^{-32}$ | -                     | 173                         |
|                                                                                   |                       |                             |                | 450  | $7.38 \times 10^{-11}$ | $1.05 \times 10^{-9}$  | $2.79 \times 10^{-9}$  | -                     | 179                         |
| <b>G1-[1]<sup>eq</sup> → G<sub>k→e</sub><sup>opt,‡</sup></b>                      | 188                   | 141                         | 306            | 1200 | $1.07 \times 10^0$     | $3.30 \times 10^0$     | $4.93 \times 10^0$     | $5.75 \times 10^0$    | 189                         |
|                                                                                   |                       |                             |                | 1328 | $1.29 \times 10^5$     | $2.05 \times 10^5$     | $2.40 \times 10^5$     | $2.46 \times 10^5$    | 207                         |
|                                                                                   |                       |                             |                | 4500 | $1.55 \times 10^{10}$  | $1.62 \times 10^{10}$  | $1.65 \times 10^{10}$  | $1.65 \times 10^{10}$ | 324                         |
| 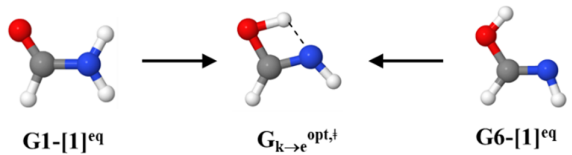 |                       |                             |                | 200  | $3.61 \times 10^{-30}$ | $2.81 \times 10^{-27}$ | $2.39 \times 10^{-26}$ | -                     | 150                         |
|                                                                                   |                       |                             |                | 450  | $3.36 \times 10^{-7}$  | $4.06 \times 10^{-6}$  | $1.08 \times 10^{-5}$  | -                     | 150                         |
| <b>G<sub>k→e</sub><sup>opt,‡</sup> ← G6-[1]<sup>eq</sup></b>                      | 169                   | 124                         | 255            | 1200 | $5.16 \times 10^2$     | $1.44 \times 10^3$     | $2.15 \times 10^3$     | $2.51 \times 10^3$    | 150                         |
|                                                                                   |                       |                             |                | 1328 | $2.03 \times 10^7$     | $3.07 \times 10^7$     | $3.59 \times 10^7$     | $3.66 \times 10^7$    | 151                         |
|                                                                                   |                       |                             |                | 4500 | $7.95 \times 10^{11}$  | $8.27 \times 10^{11}$  | $8.40 \times 10^{11}$  | $8.40 \times 10^{11}$ | 177                         |

T<sub>c</sub> = crossover temperature; <sup>eq</sup> = equilibrium structure; k<sup>Class</sup> = rate constant obtained from classical TST; k<sup>Q-vib</sup> = rate constant obtained with quantized vibrations including the zero-point vibrational energy; k<sup>S-Wig</sup> = rate constant obtained with quantized vibrations and tunneling correction through the simplified Wigner correction to the second order; k<sup>F-Wig</sup> = full Wigner-corrected rate constant at T above T<sub>c</sub>;  $\Delta E^{\ddagger}$  = energy barrier with respect to the precursor.

**Table S12<sup>†</sup>** Rate constants (k), enthalpies of activation ( $\Delta H^{\circ,\ddagger}$ ) and Gibbs free energy barriers ( $\Delta G^{\circ,\ddagger}$ ) for the keto-enol tautomerism of HCONH<sub>2</sub> in the S<sub>1</sub> state (structure **E1-[2]<sup>eq</sup>** → **E6-[2]<sup>eq</sup>**), obtained based on the transition state theory and the optimize transition geometry (**E<sub>k→e</sub><sup>opt,‡</sup>**). Energies, rate constants and temperatures are in kJ mol<sup>-1</sup>, s<sup>-1</sup> and K, respectively.

|                                                                                   | $\Delta E^{\ddagger}$ | $\Delta H^{\circ,\ddagger}$ | T <sub>c</sub> | T    | k <sup>Class</sup>     | k <sup>Q-vib</sup>     | k <sup>S-Wig</sup>     | k <sup>F-Wig</sup>    | $\Delta G^{\circ,\ddagger}$ |
|-----------------------------------------------------------------------------------|-----------------------|-----------------------------|----------------|------|------------------------|------------------------|------------------------|-----------------------|-----------------------------|
|                                                                                   |                       |                             |                | 200  | $2.91 \times 10^{-19}$ | $8.42 \times 10^{-17}$ | $1.31 \times 10^{-15}$ | -                     | 110                         |
|                                                                                   |                       |                             |                | 450  | $9.95 \times 10^{-2}$  | $8.59 \times 10^{-1}$  | $3.32 \times 10^0$     | -                     | 112                         |
| <b>E1-[2]<sup>eq</sup> → E<sub>k→e</sub><sup>opt,‡</sup></b>                      | 94                    | 111                         | 594            | 1200 | $5.82 \times 10^7$     | $9.49 \times 10^7$     | $1.33 \times 10^8$     | $1.48 \times 10^8$    | 125                         |
| 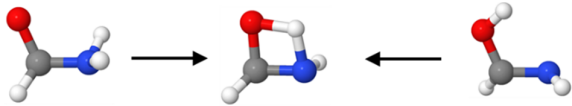 |                       |                             |                | 1328 | $1.87 \times 10^7$     | $2.81 \times 10^8$     | $3.74 \times 10^8$     | $4.01 \times 10^8$    | 127                         |
|                                                                                   |                       |                             |                | 4500 | $4.19 \times 10^{11}$  | $4.36 \times 10^{11}$  | $4.49 \times 10^{11}$  | $4.49 \times 10^{11}$ | 201                         |
|                                                                                   |                       |                             |                | 200  | $3.43 \times 10^{-22}$ | $2.17 \times 10^{-20}$ | $3.63 \times 10^{-19}$ | -                     | 124                         |
|                                                                                   |                       |                             |                | 450  | $4.22 \times 10^{-3}$  | $2.16 \times 10^{-2}$  | $8.87 \times 10^{-2}$  | -                     | 126                         |
| <b>E<sub>k→e</sub><sup>opt,‡</sup> ← E6-[2]<sup>eq</sup></b>                      | 138                   | 150                         | 594            | 1200 | $1.48 \times 10^7$     | $2.19 \times 10^7$     | $3.14 \times 10^7$     | $3.55 \times 10^7$    | 139                         |
|                                                                                   |                       |                             |                | 1328 | $6.96 \times 10^6$     | $1.17 \times 10^7$     | $1.55 \times 10^7$     | $1.66 \times 10^7$    | 162                         |
|                                                                                   |                       |                             |                | 4500 | $2.46 \times 10^{11}$  | $2.59 \times 10^{11}$  | $2.67 \times 10^{11}$  | $2.67 \times 10^{11}$ | 220                         |

T<sub>c</sub> = crossover temperature; <sup>eq</sup> = equilibrium structure; k<sup>Class</sup> = rate constant obtained from classical TST; k<sup>Q-vib</sup> = rate constant obtained with quantized vibrations including the zero-point vibrational energy; k<sup>S-Wig</sup> = rate constant obtained with quantized vibrations and tunneling correction through the simplified Wigner correction to the second order; k<sup>F-Wig</sup> = full Wigner-corrected rate constant at T above T<sub>c</sub>;  $\Delta E^{\ddagger}$  = energy barrier with respect to the precursor.
